# Supplementary material for: Imaging performance of portable and conventional ultrasound imaging technologies for ophthalmic applications
Source: PubMed Central journal article supplement (PMC11090327; doi:10.1371/journal.pone.0300451), 2024-05-13
Supplement: pone.0300451.s005.pdf [file pone.0300451.s005.pdf]

# Ultrasound Imaging Modality Evaluation

Scan QR Code to Start Questionnaire →

OR go to

<https://tinyurl.com/y3pjs8gl>

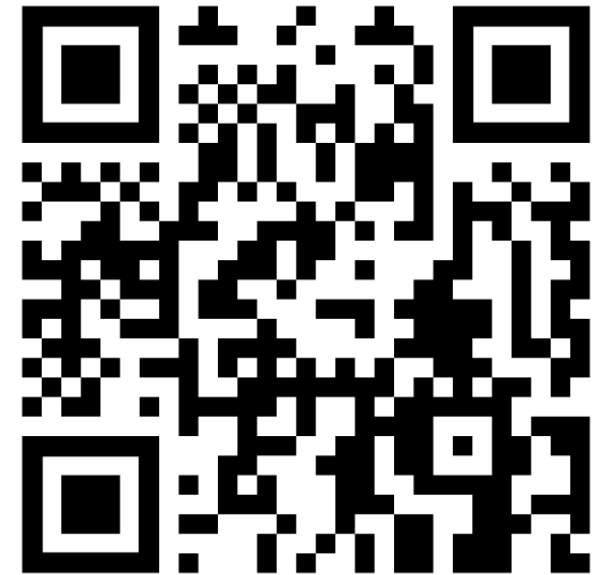

1A

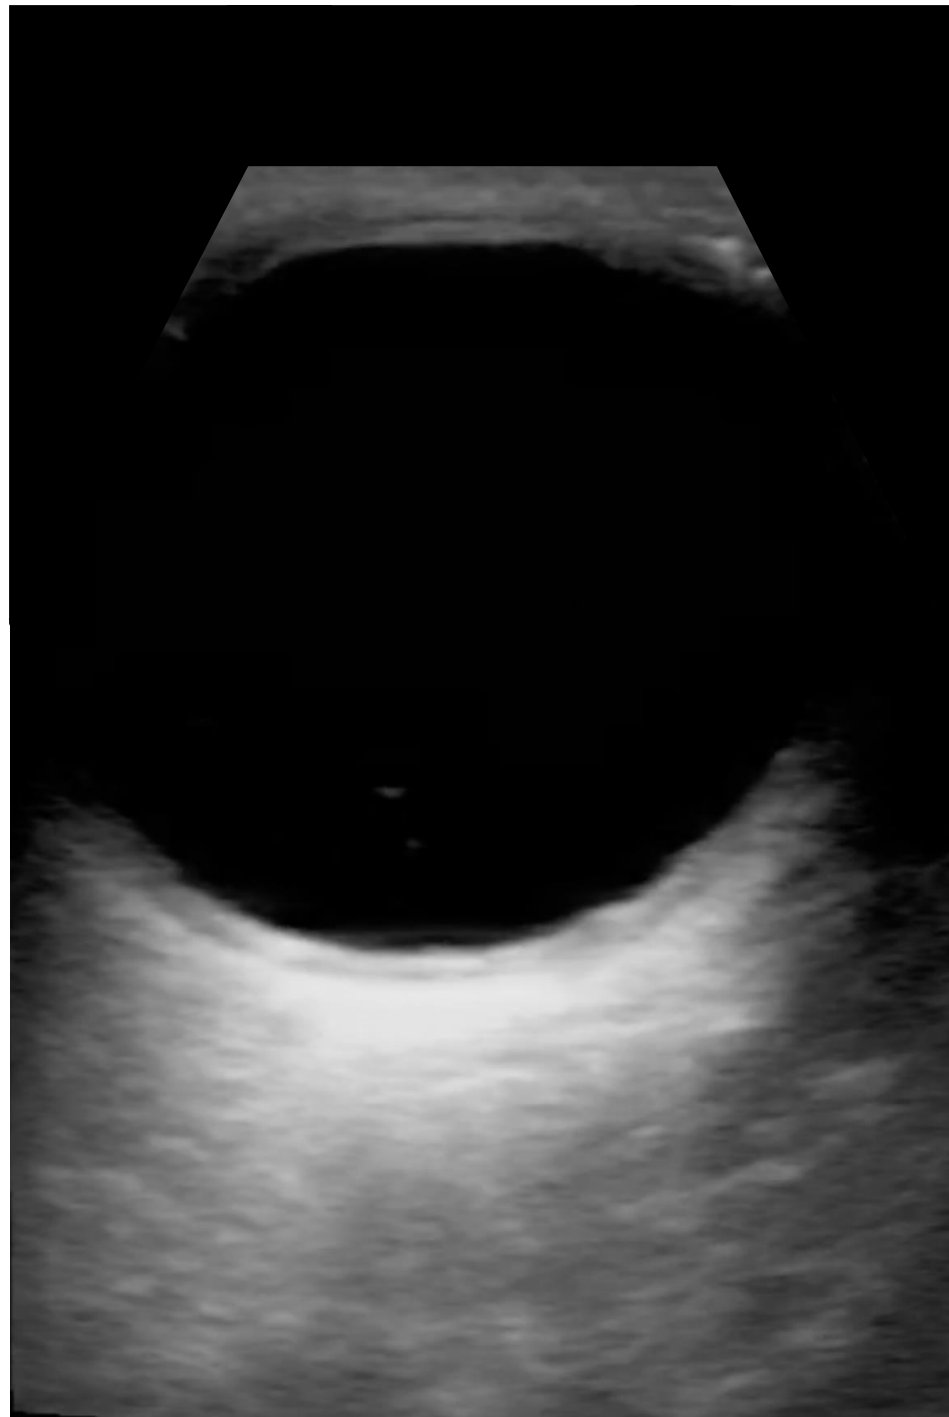

CC: Vitreous Hemorrhage  
51 y/o m, hx DPR, c/o  
heme OD

# 1B

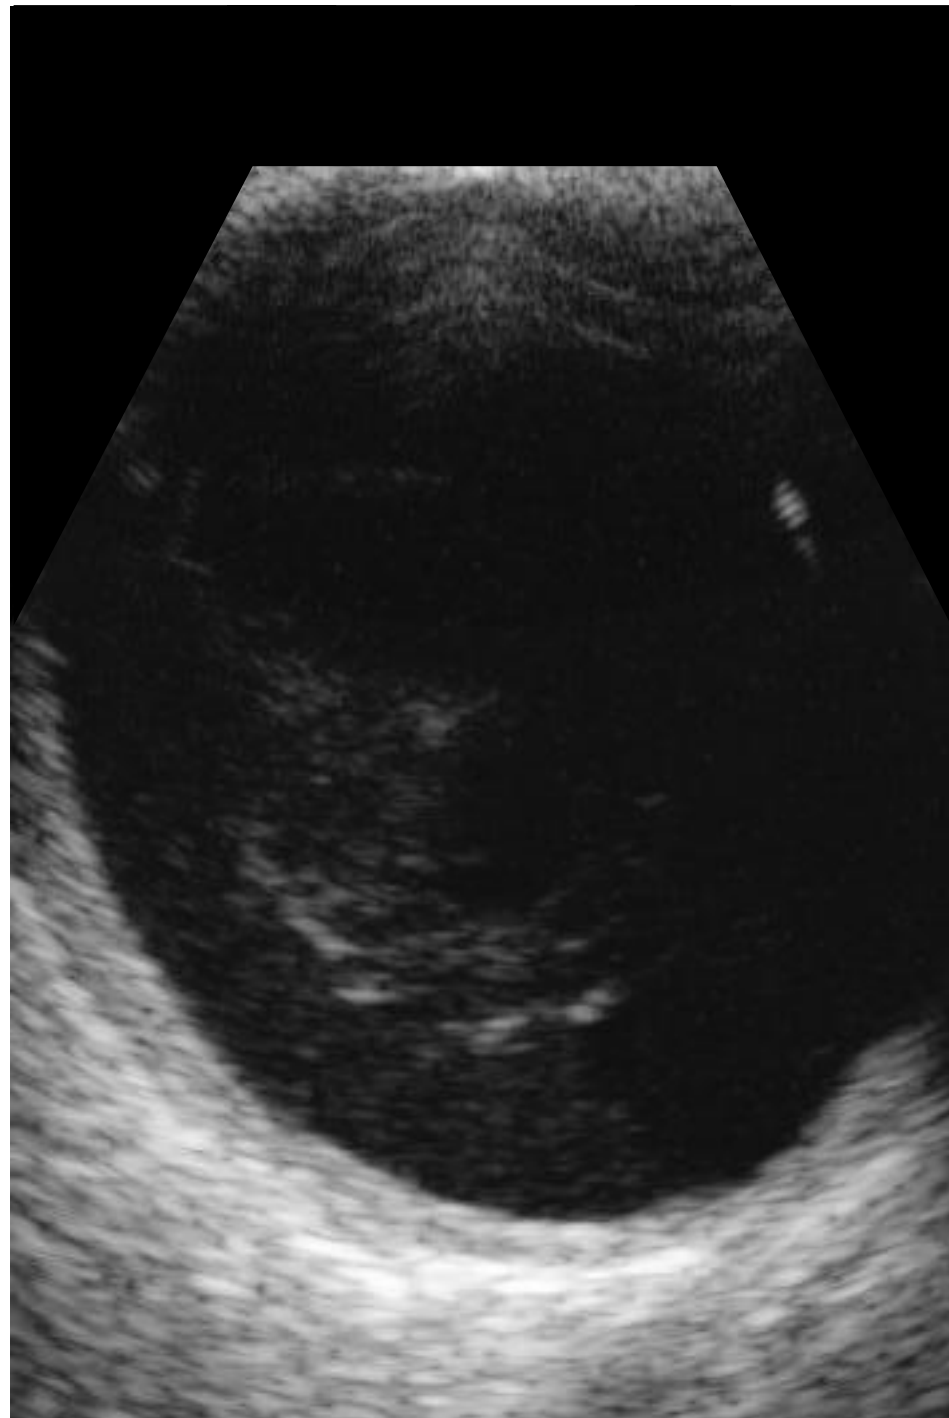

CC: Vitreous Hemorrhage  
51 y/o m, hx DPR, c/o  
heme OD

1C

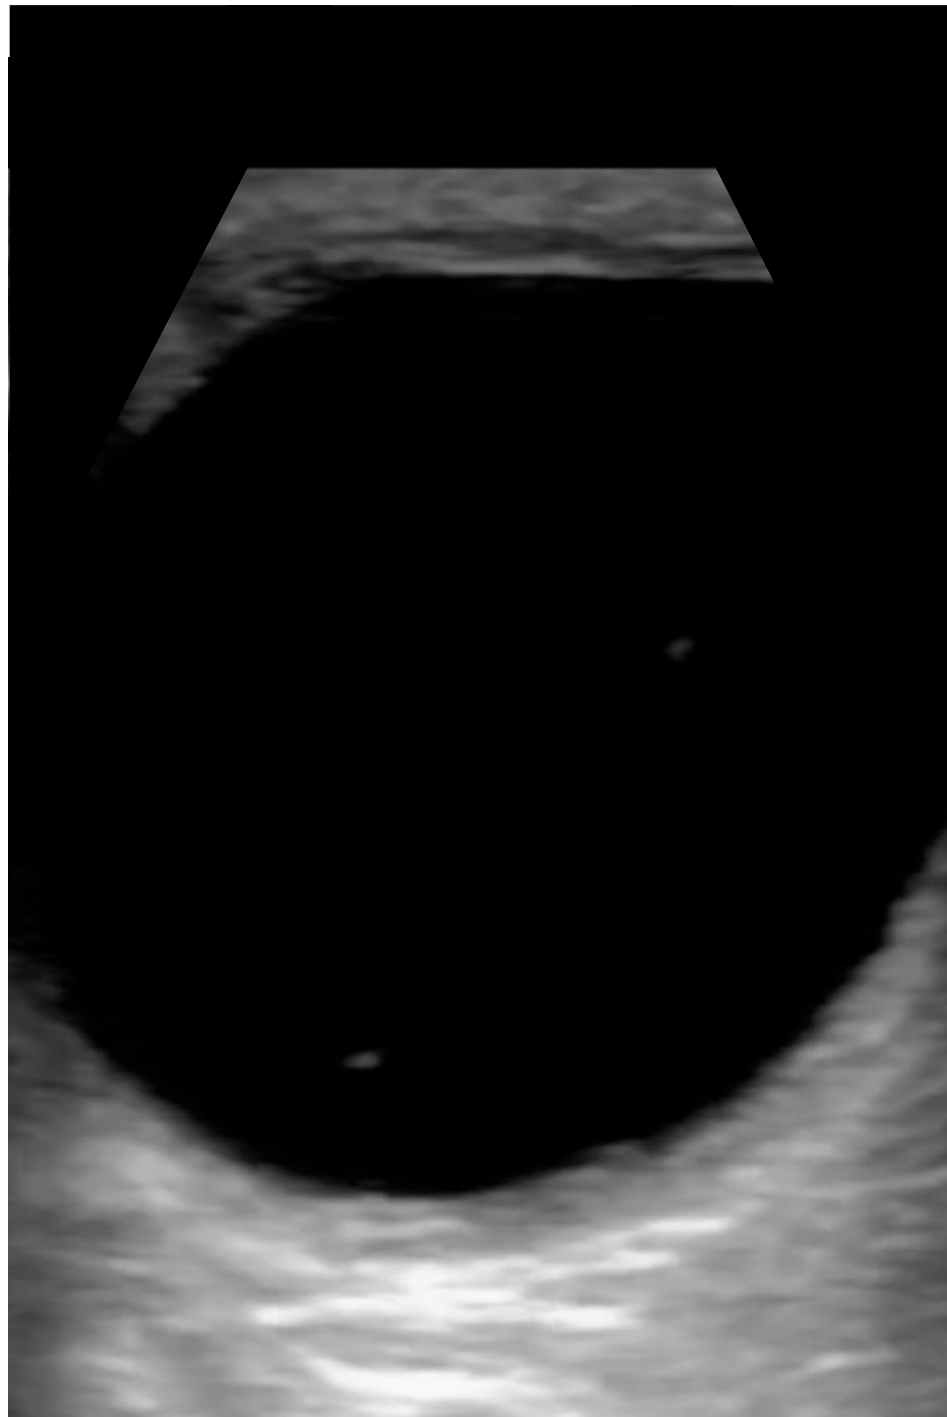

CC: Vitreous Hemorrhage  
51 y/o m, hx DPR, c/o  
heme OD

1D

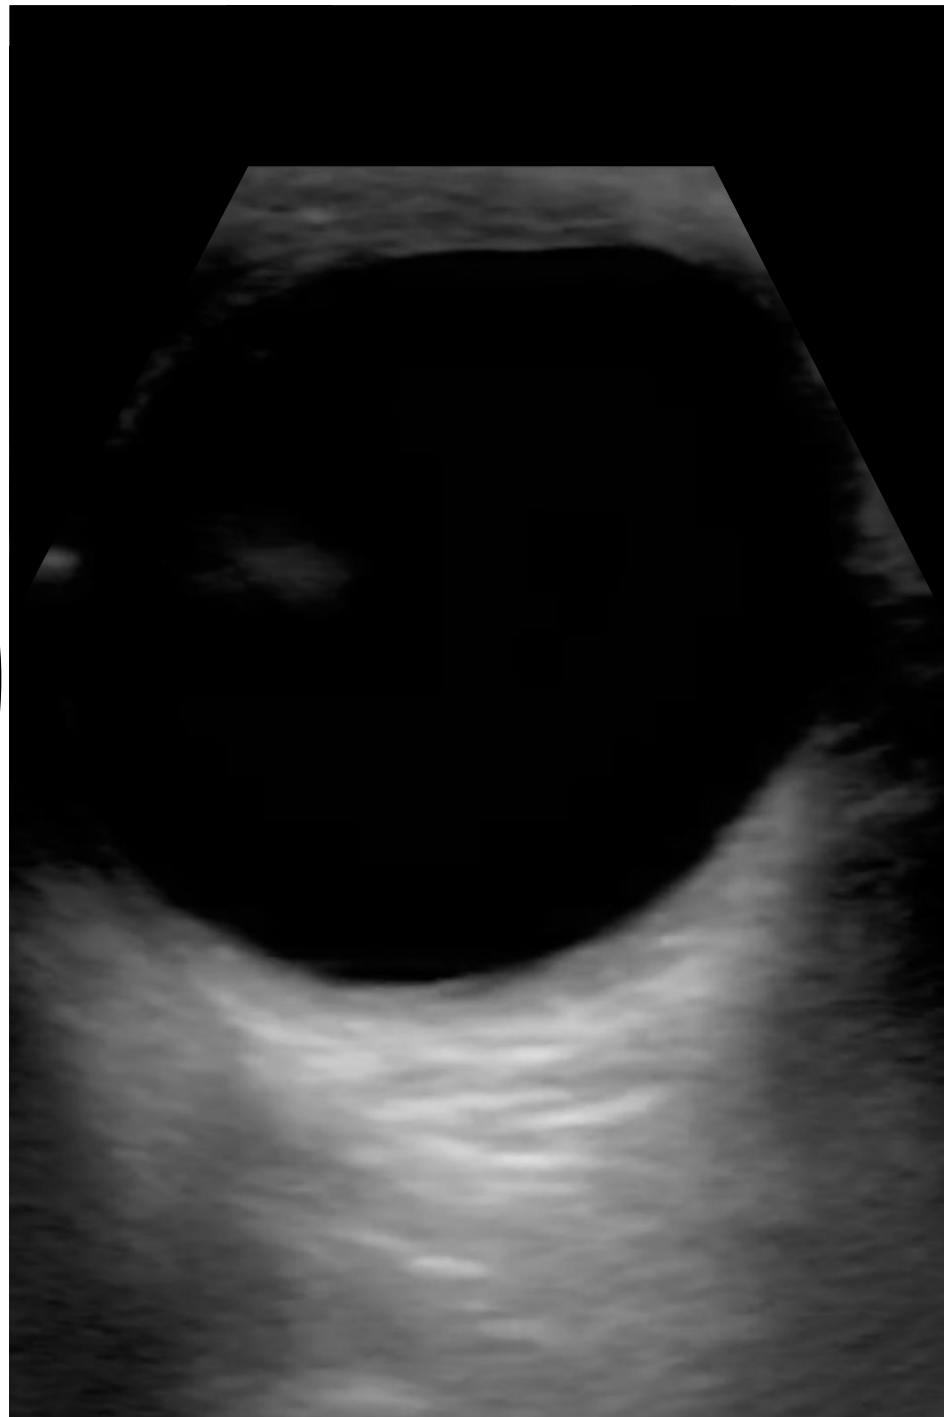

CC: Vitreous Hemorrhage  
51 y/o m, hx DPR, c/o  
heme OD

1E

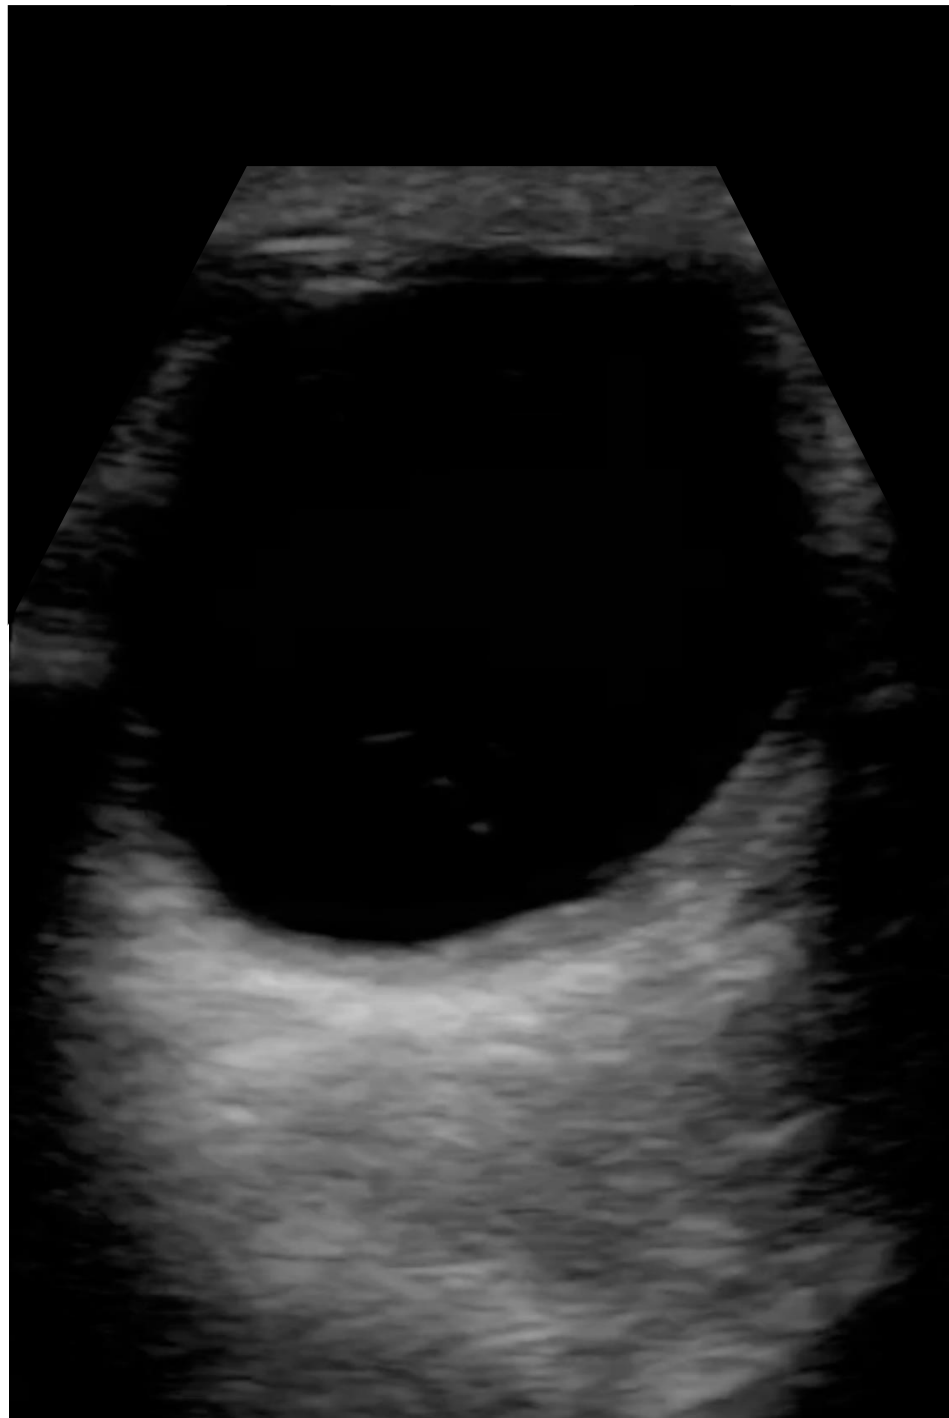

CC: Vitreous Hemorrhage  
51 y/o m, hx DPR, c/o  
heme OD

2A

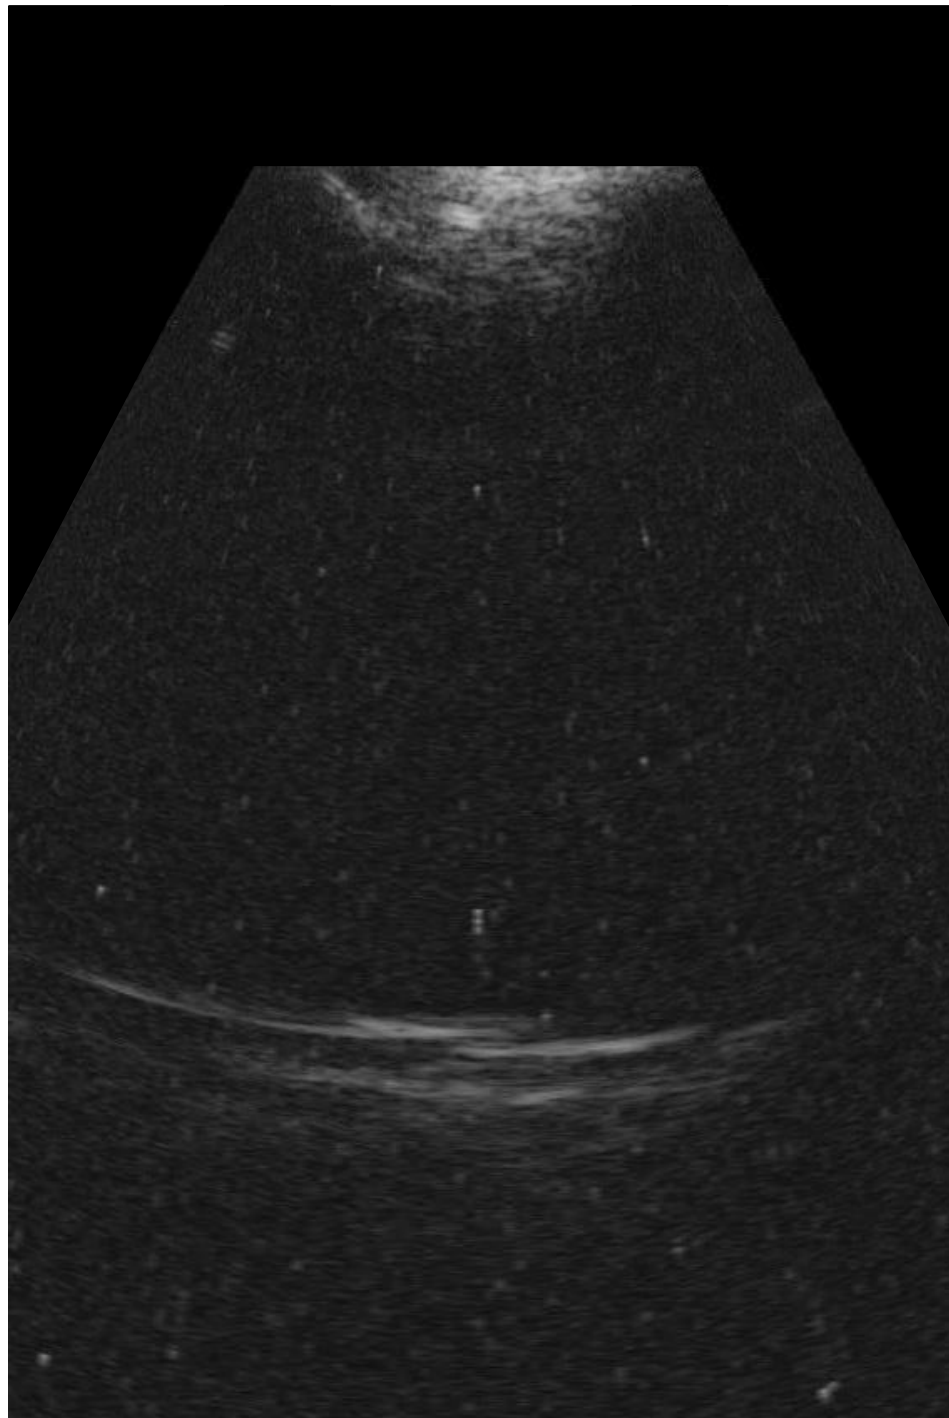

CC: Silicone Oil F/u  
21 y/o M tractional RD  
OS s/p PPV/SOR/  
phacoemulsification/  
anterior membrane  
dissection/SO

2B

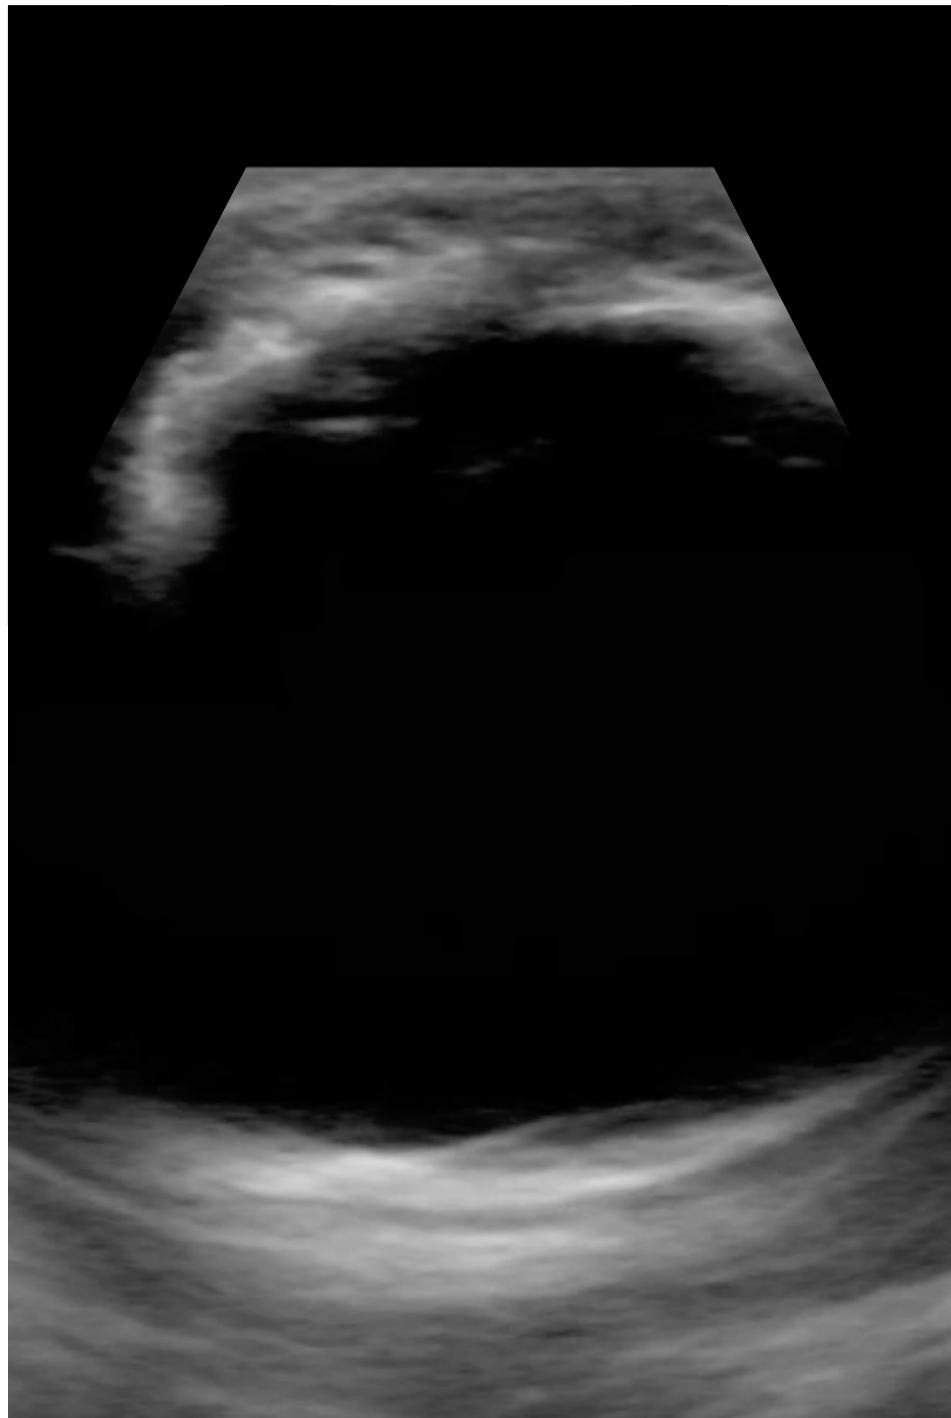

CC: Silicone Oil F/u  
21 y/o M tractional RD  
OS s/p PPV/SOR/  
phacoemulsification/  
anterior membrane  
dissection/SO



20

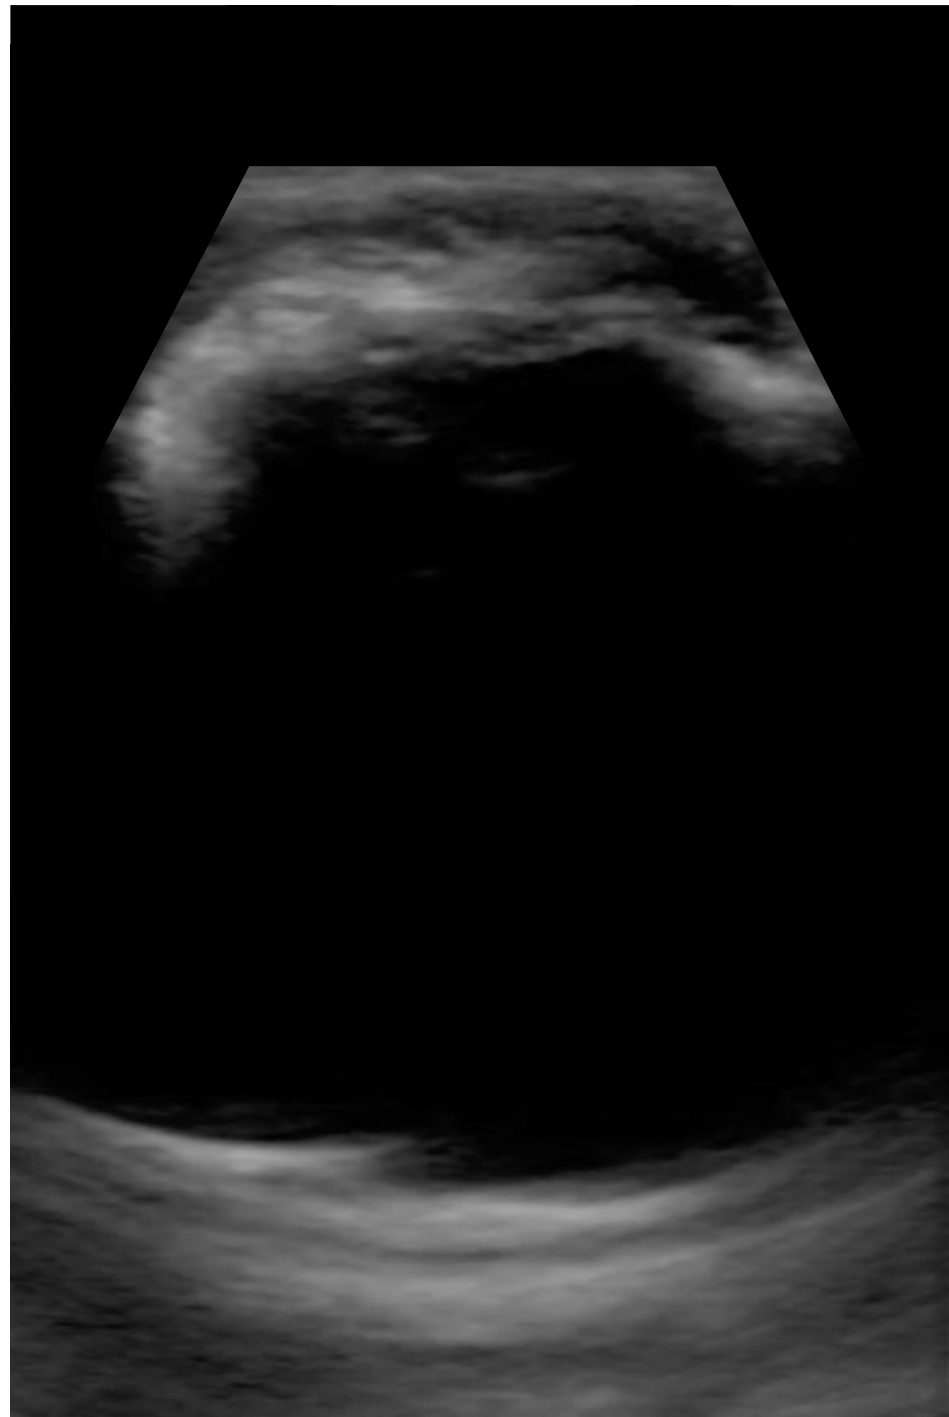

CC: Silicone Oil F/u  
21 y/o M tractional RD  
OS s/p PPV/SOR/  
phacoemulsification/  
anterior membrane  
dissection/SO

# 2D

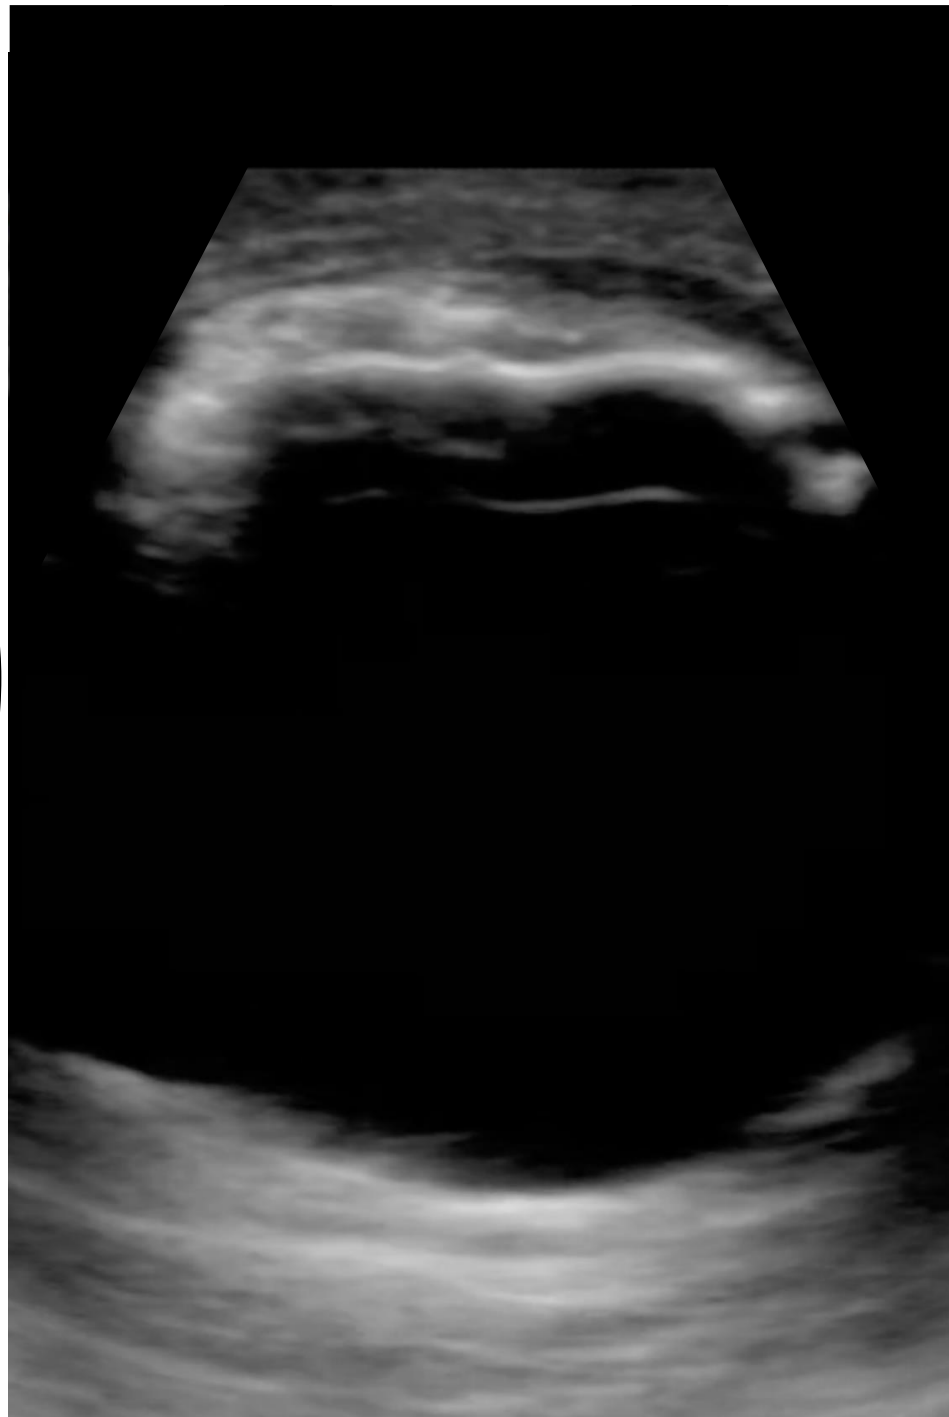

CC: Silicone Oil F/u  
21 y/o M tractional RD  
OS s/p PPV/SOR/  
phacoemulsification/  
anterior membrane  
dissection/SO

ZE

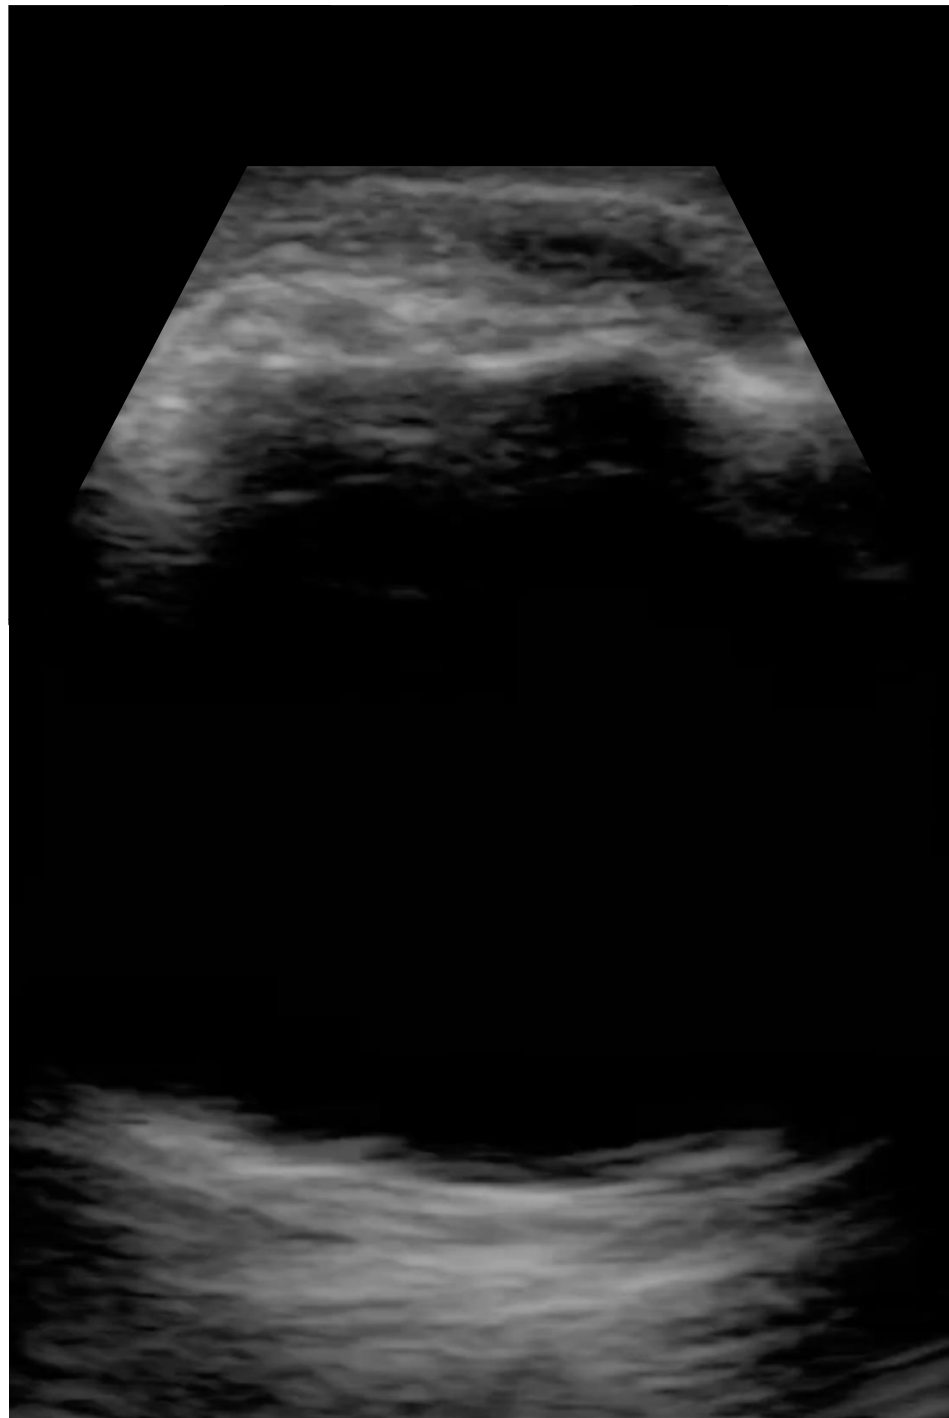

CC: Silicone Oil F/u  
21 y/o M tractional RD  
OS s/p PPV/SOR/  
phacoemulsification/  
anterior membrane  
dissection/SO

3A

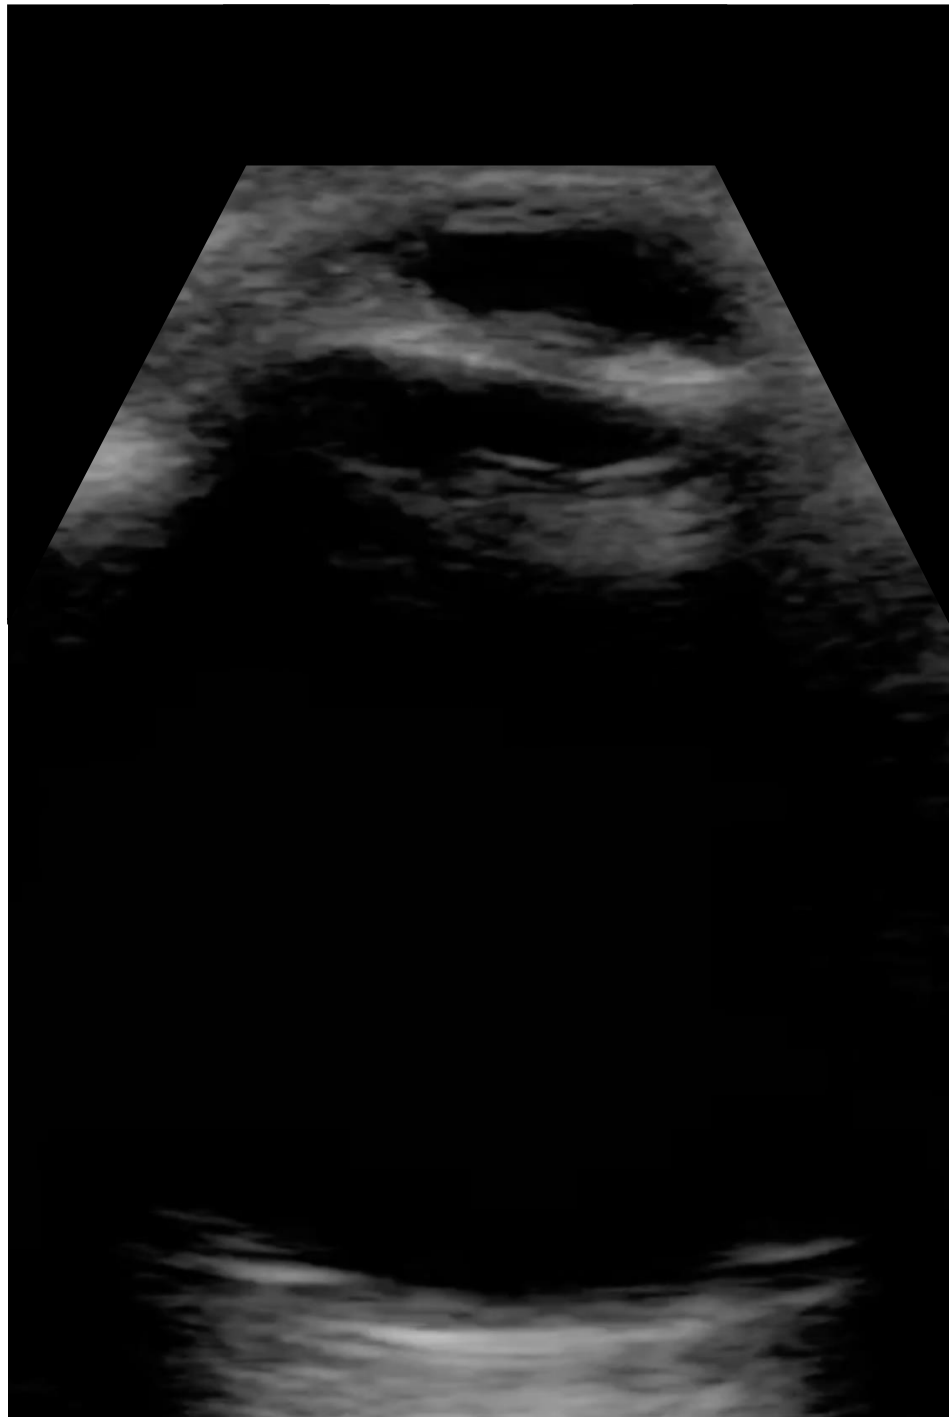

CC: Silicone Oil F/u  
26 y/o M RD OS  
s/p CE/PPV/MP/  
retinectomy/SO

3B

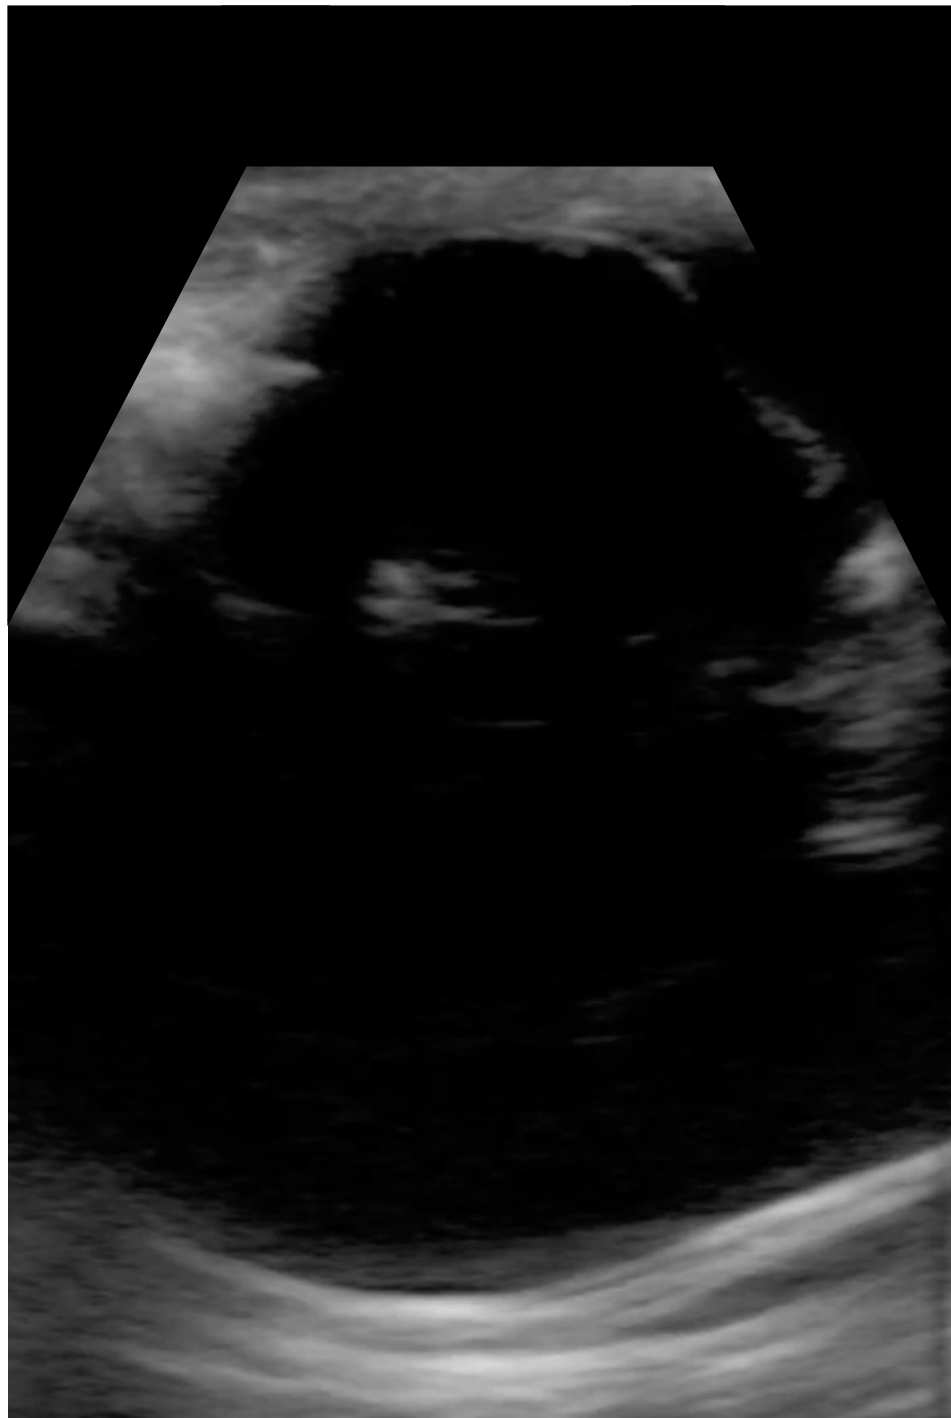

CC: Silicone Oil F/u  
26 y/o M RD OS  
s/p CE/PPV/MP/  
retinectomy/SO

3C

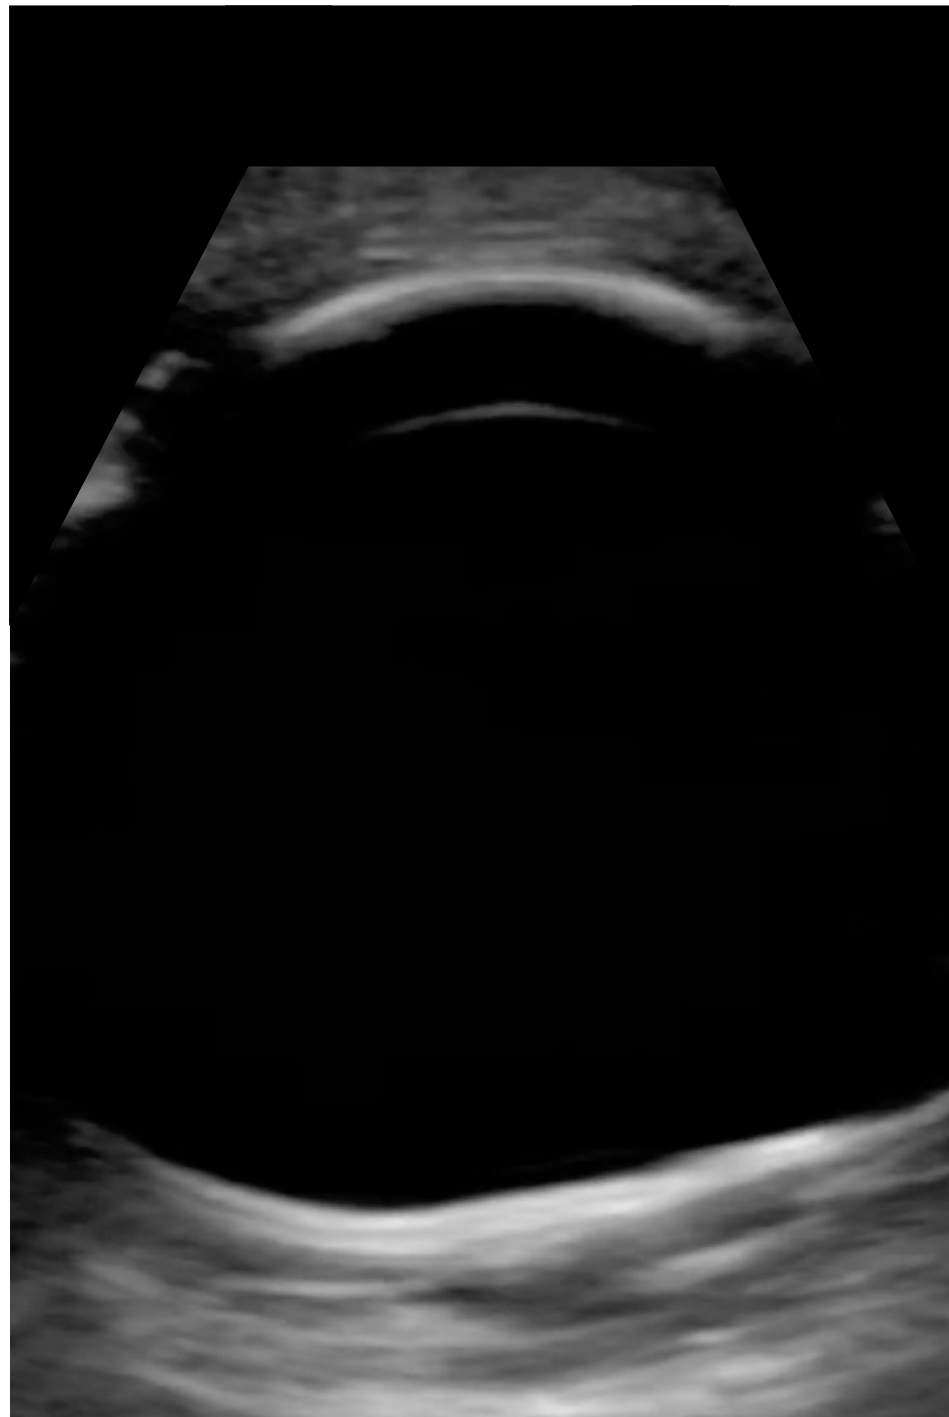

CC: Silicone Oil F/u  
26 y/o M RD OS  
s/p CE/PPV/MP/  
retinectomy/SO

# 3D

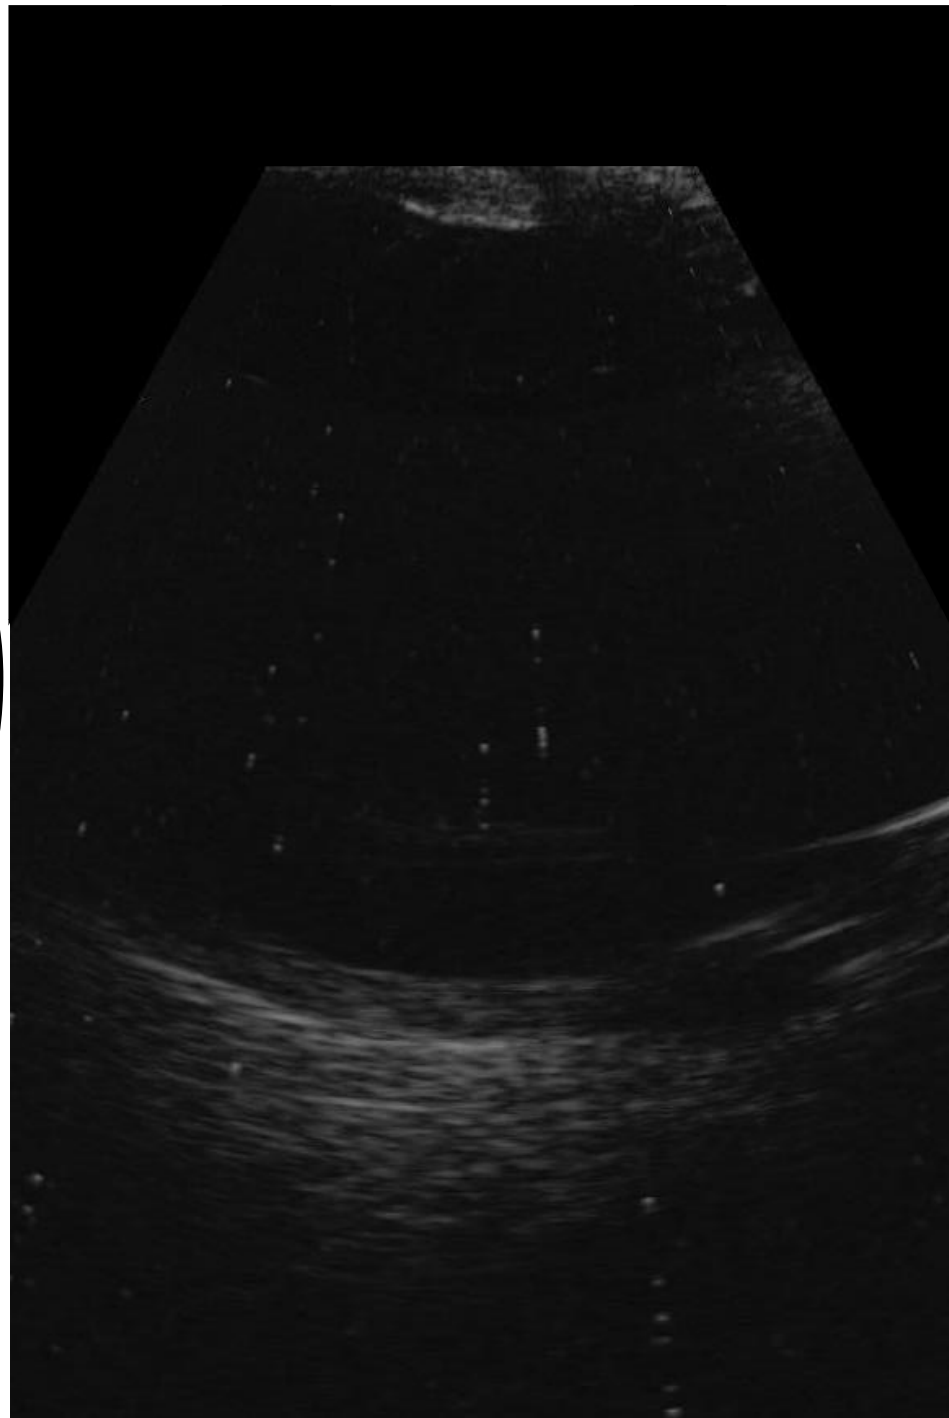

CC: Silicone Oil F/u  
26 y/o M RD OS  
s/p CE/PPV/MP/  
retinectomy/SO

3E

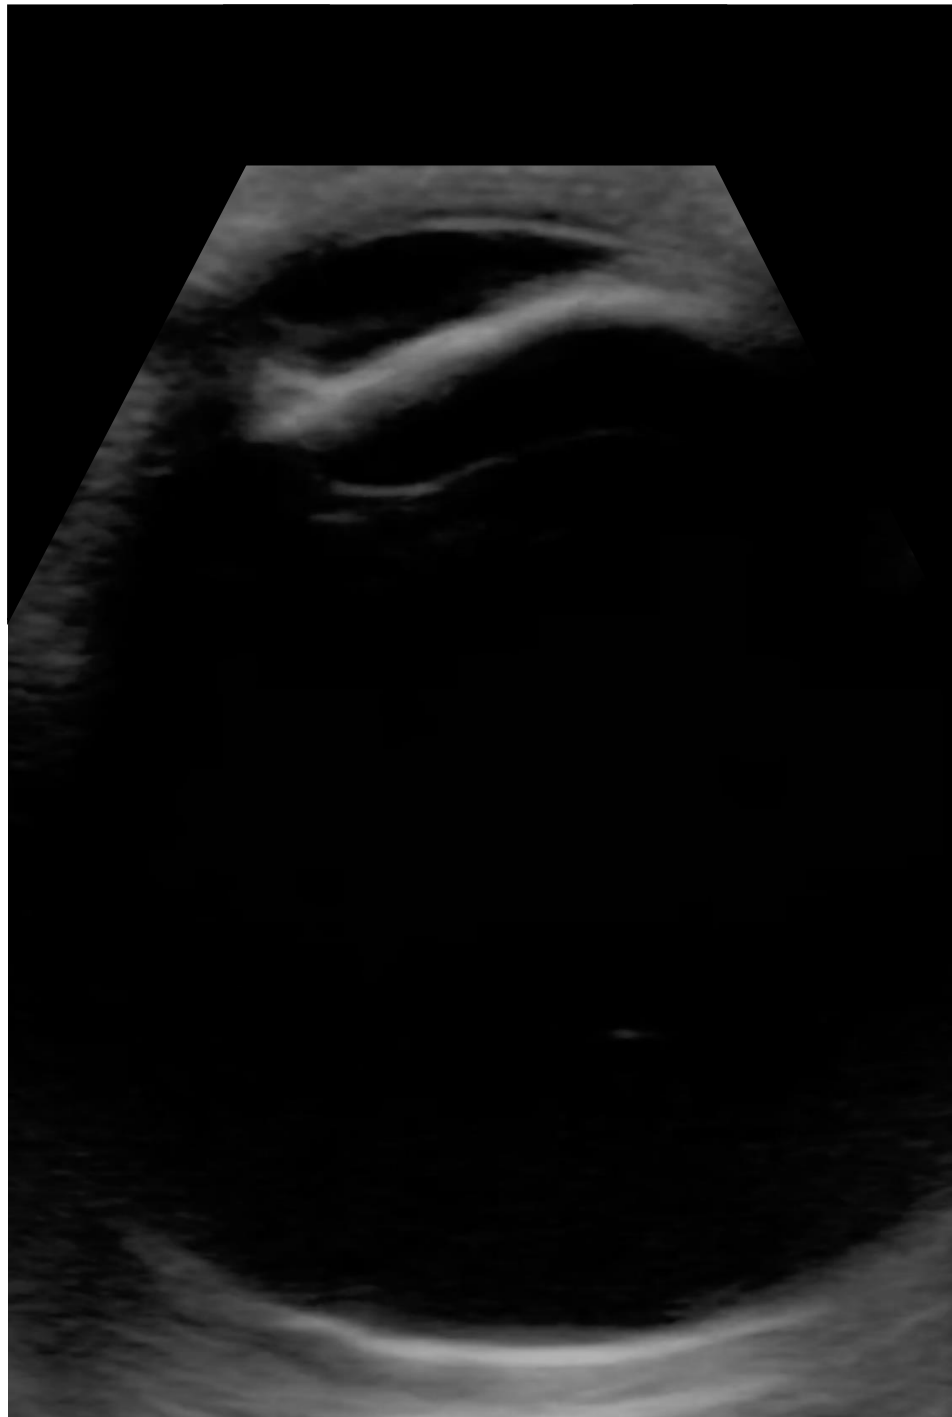

CC: Silicone Oil F/u  
26 y/o M RD OS  
s/p CE/PPV/MP/  
retinectomy/SO



4A

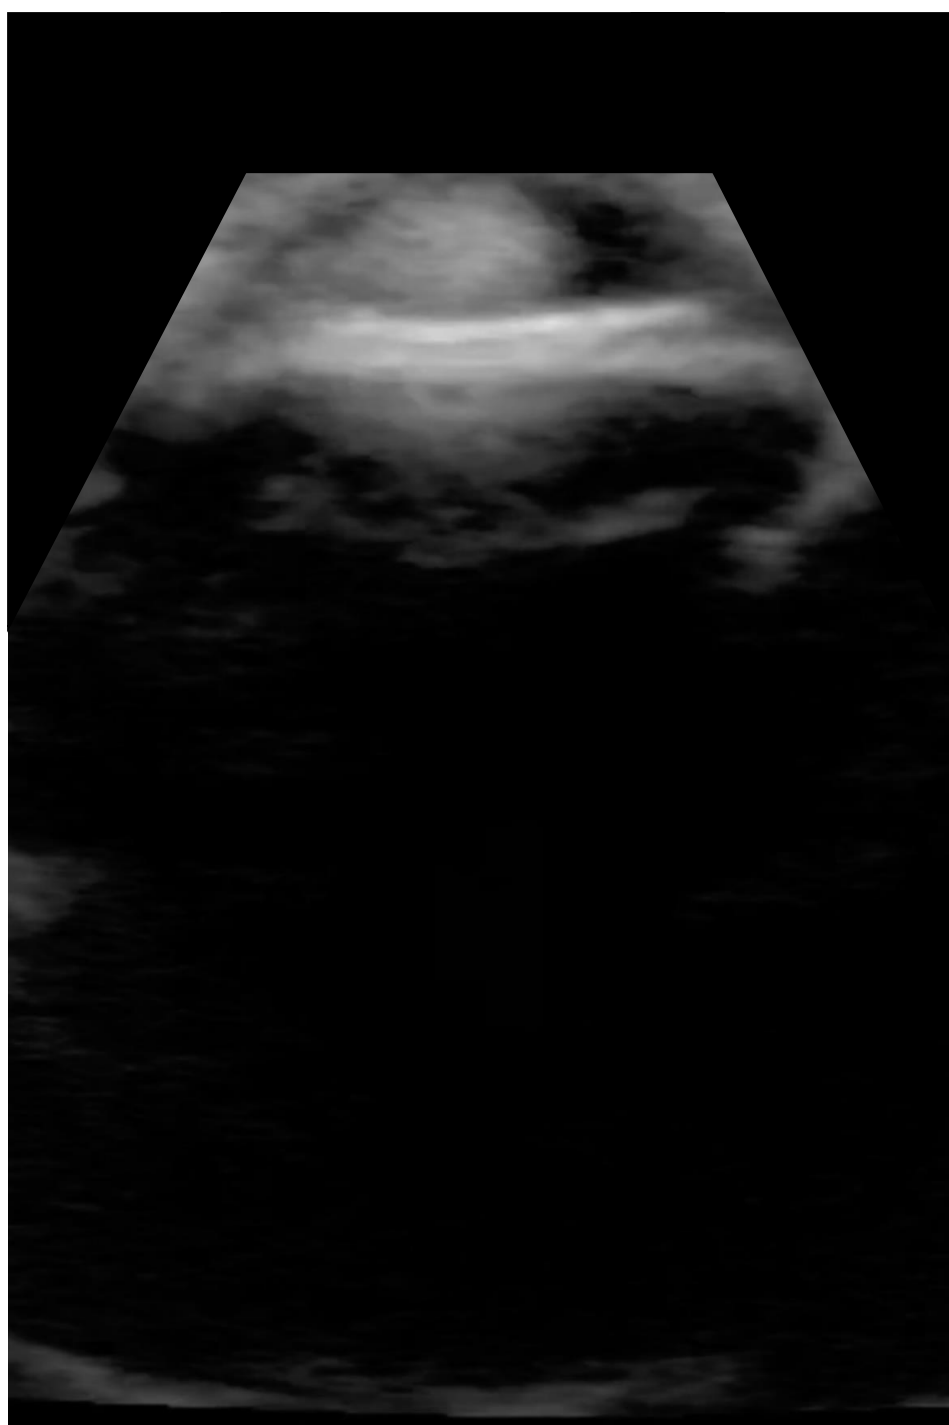

CC: Silicone Oil F/u  
66 y/o M RD OD s/p  
PPV/SOI

4B

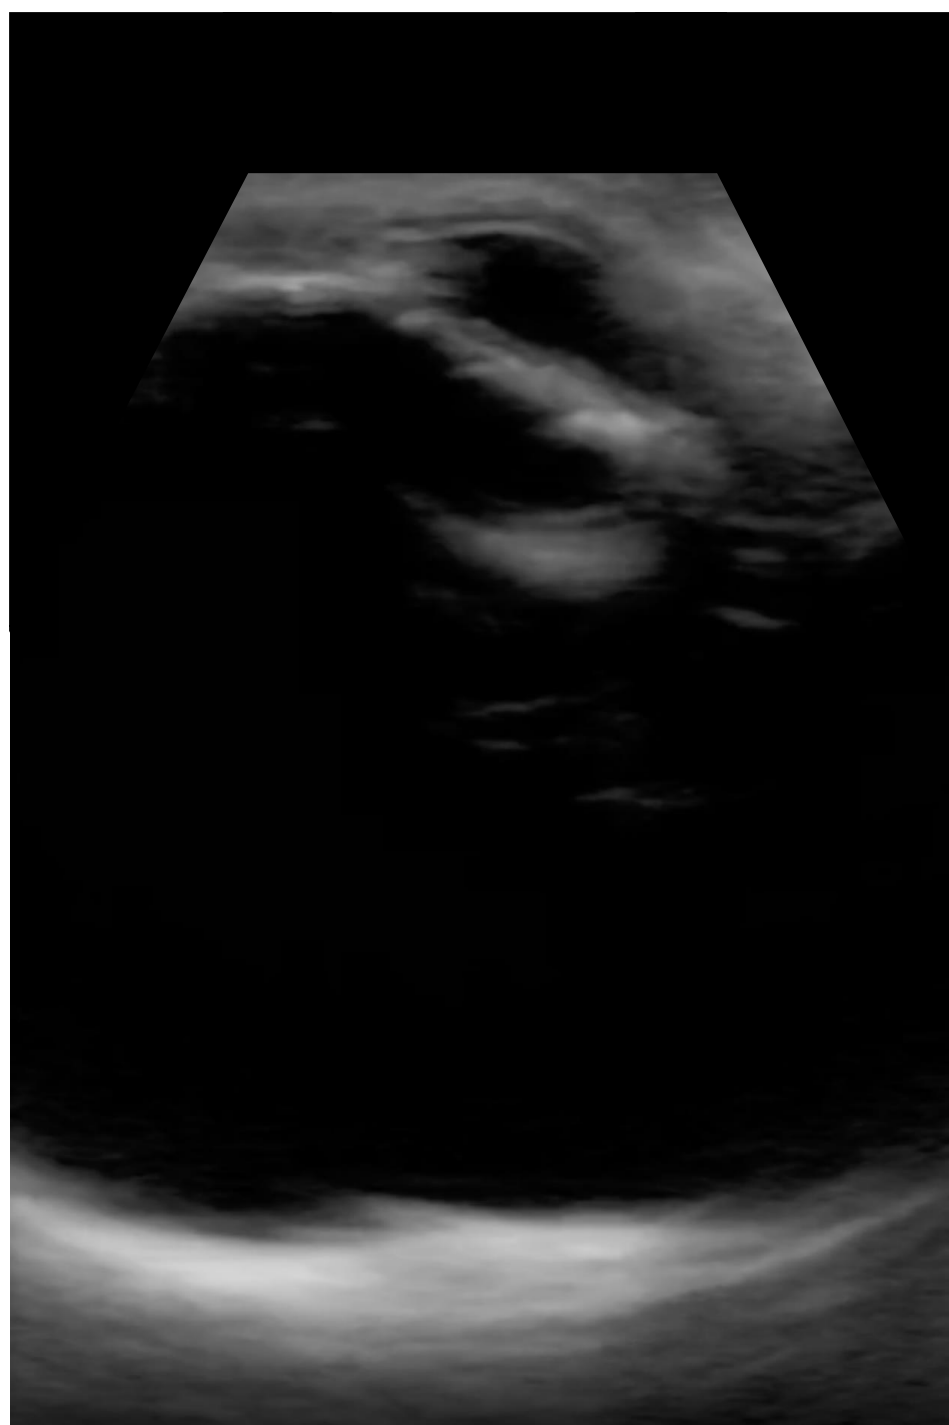

CC: Silicone Oil F/u  
66 y/o M RD OD s/p  
PPV/SOI

# 4C

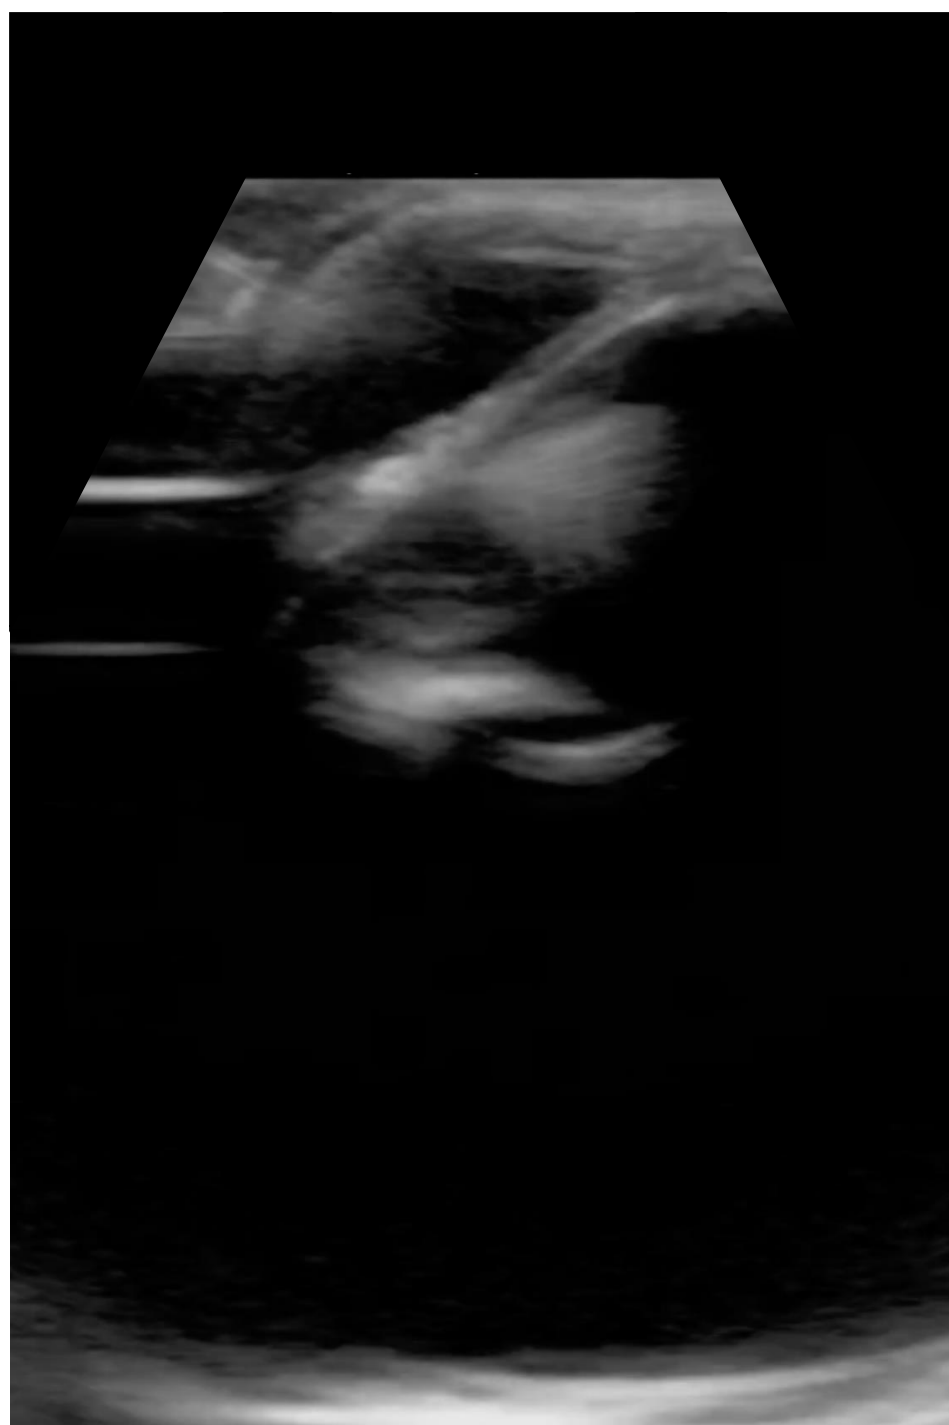

CC: Silicone Oil F/u  
66 y/o M RD OD s/p  
PPV/SOI

# 4D

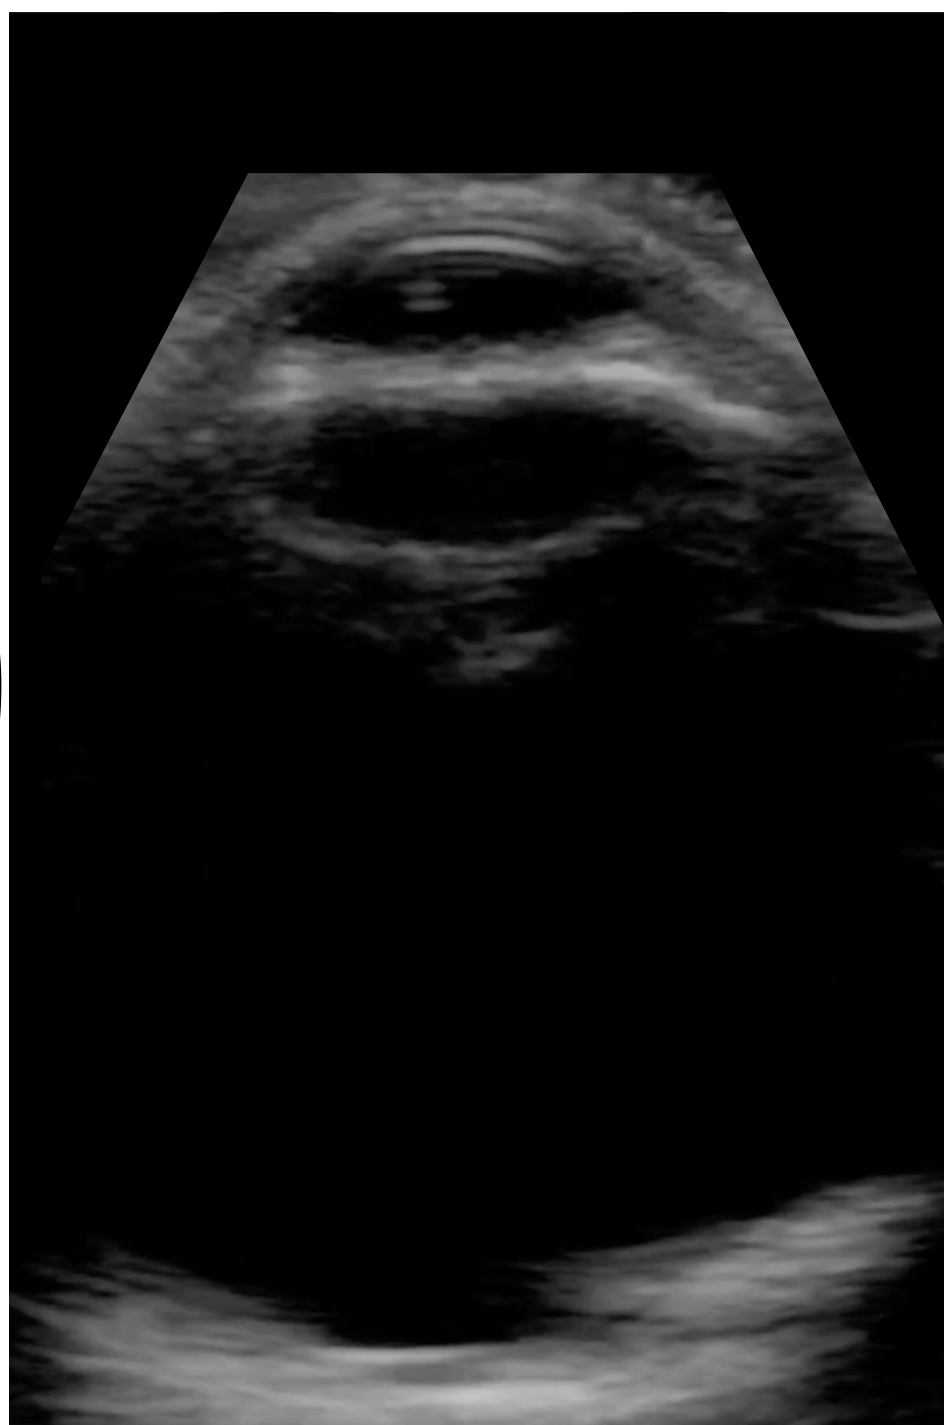

CC: Silicone Oil F/u  
66 y/o M RD OD s/p  
PPV/SOI

4E

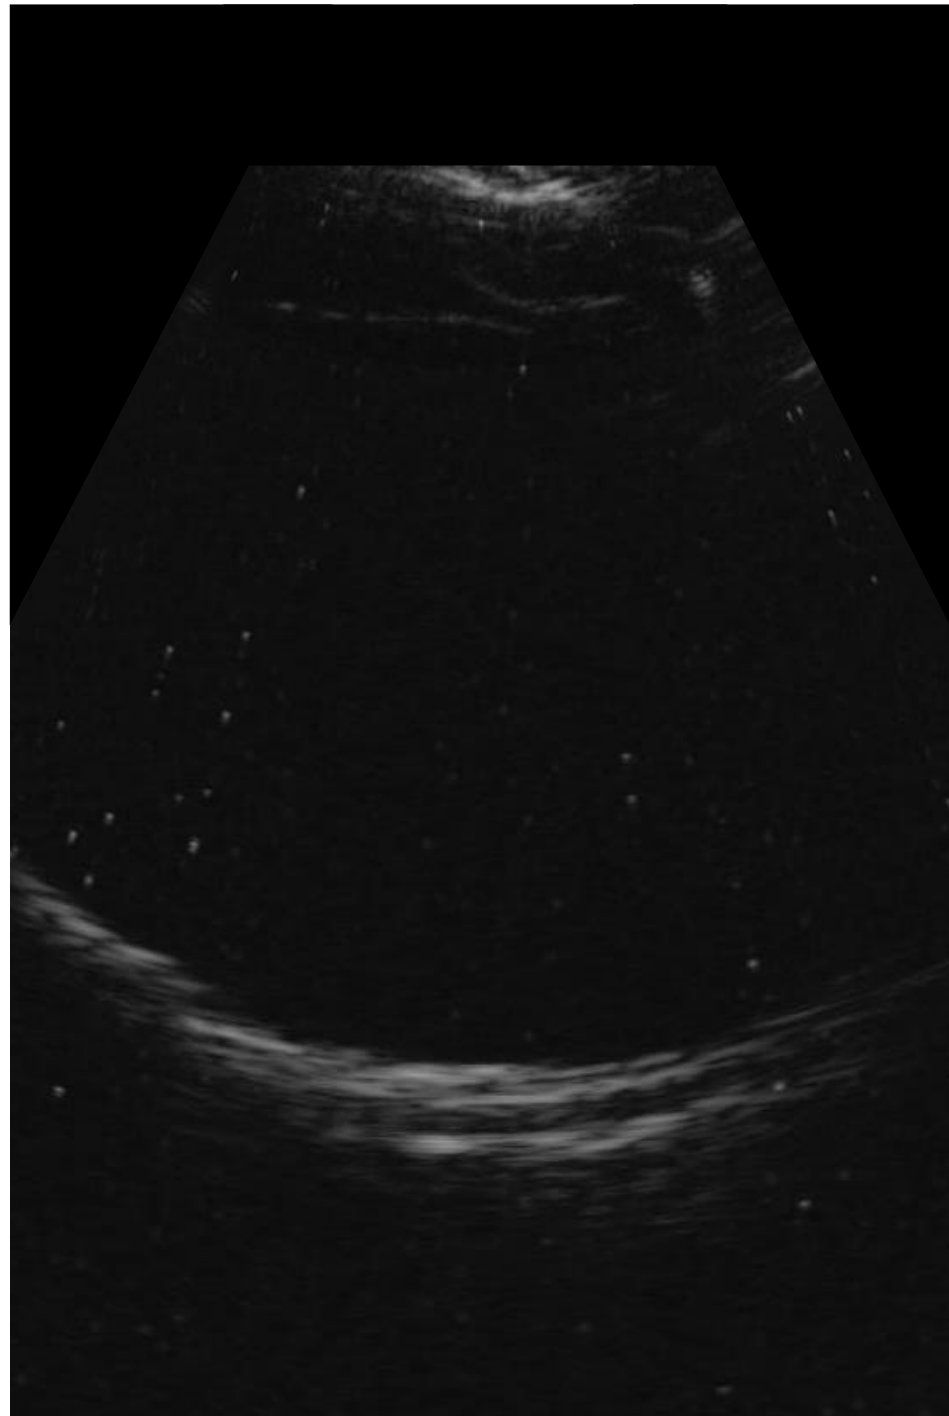

CC: Silicone Oil F/u  
66 y/o M RD OD s/p  
PPV/SOI

5A

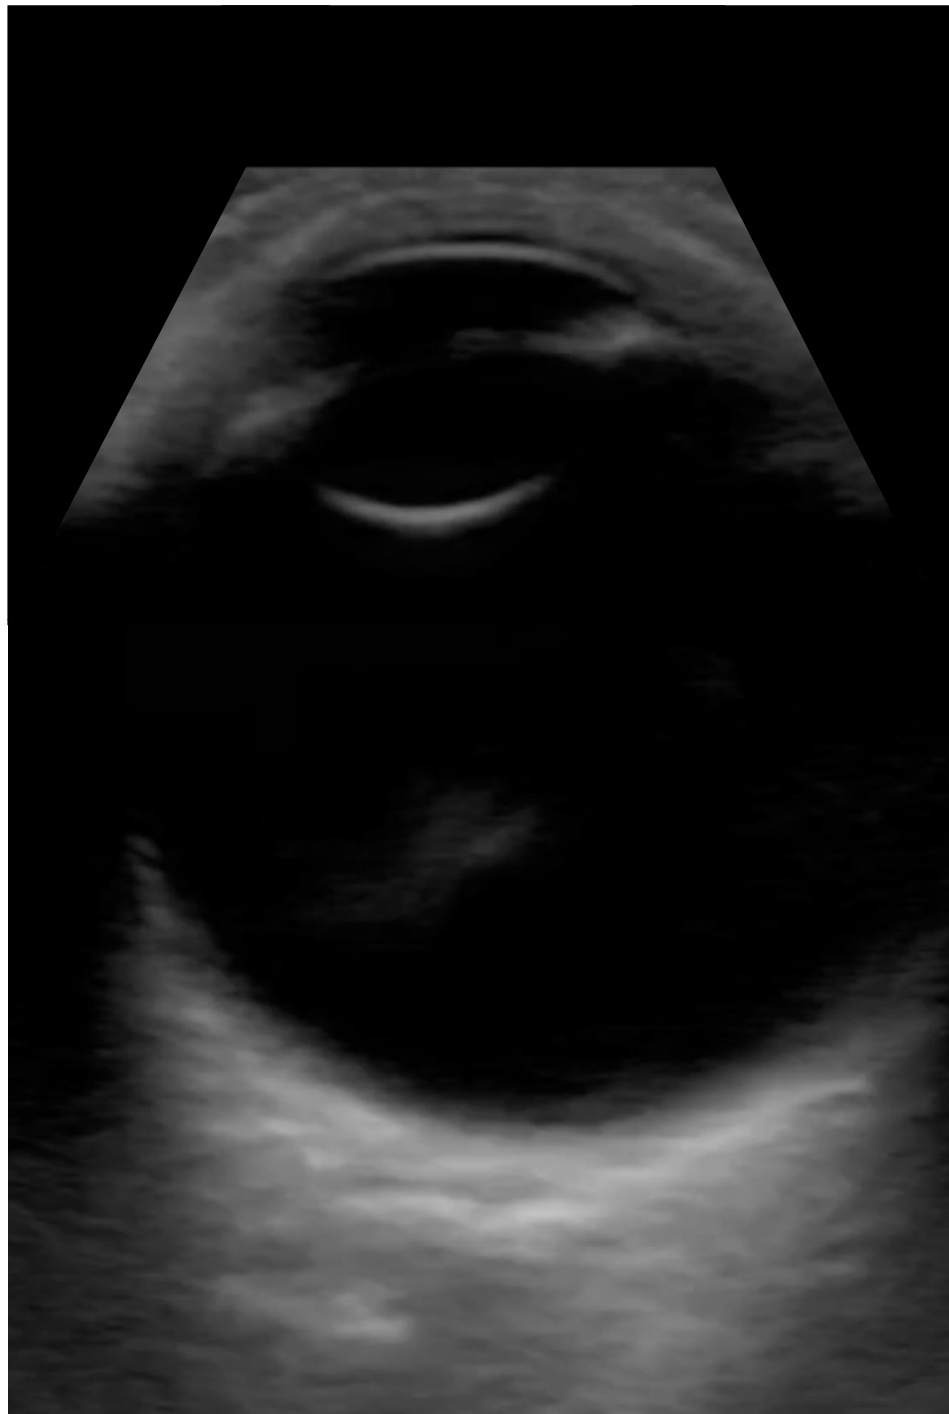

CC: CME F/u + Floaters  
71y/o M w/ cystoid  
macular degeneration  
OD, floater w/ PPV/AFX

5B

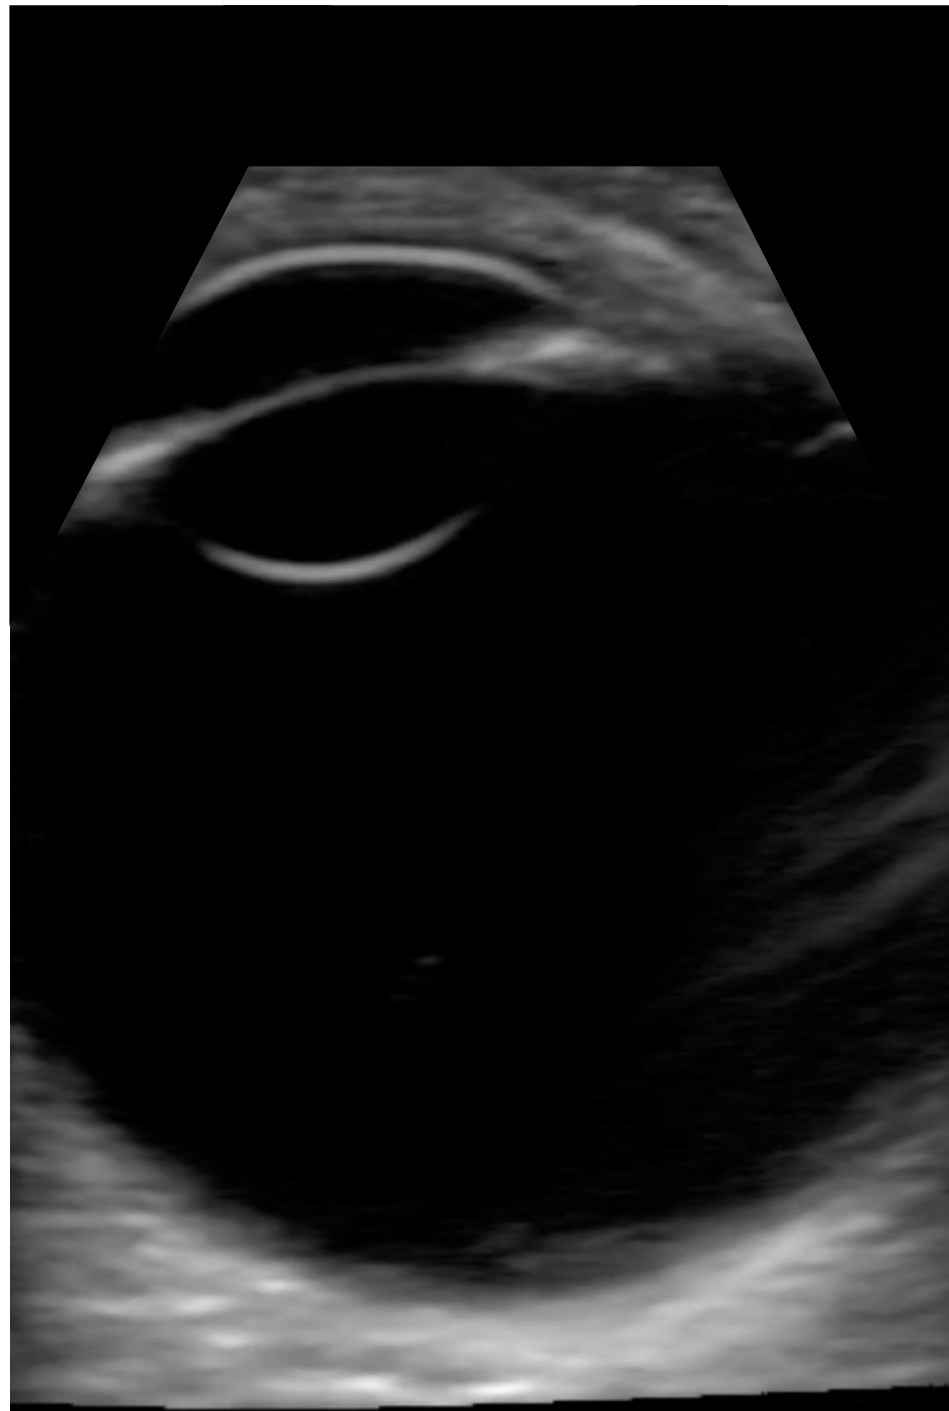

CC: CME F/u + Floaters  
71y/o M w/ cystoid  
macular degeneration  
OD, floater w/ PPV/AFX

# 5C

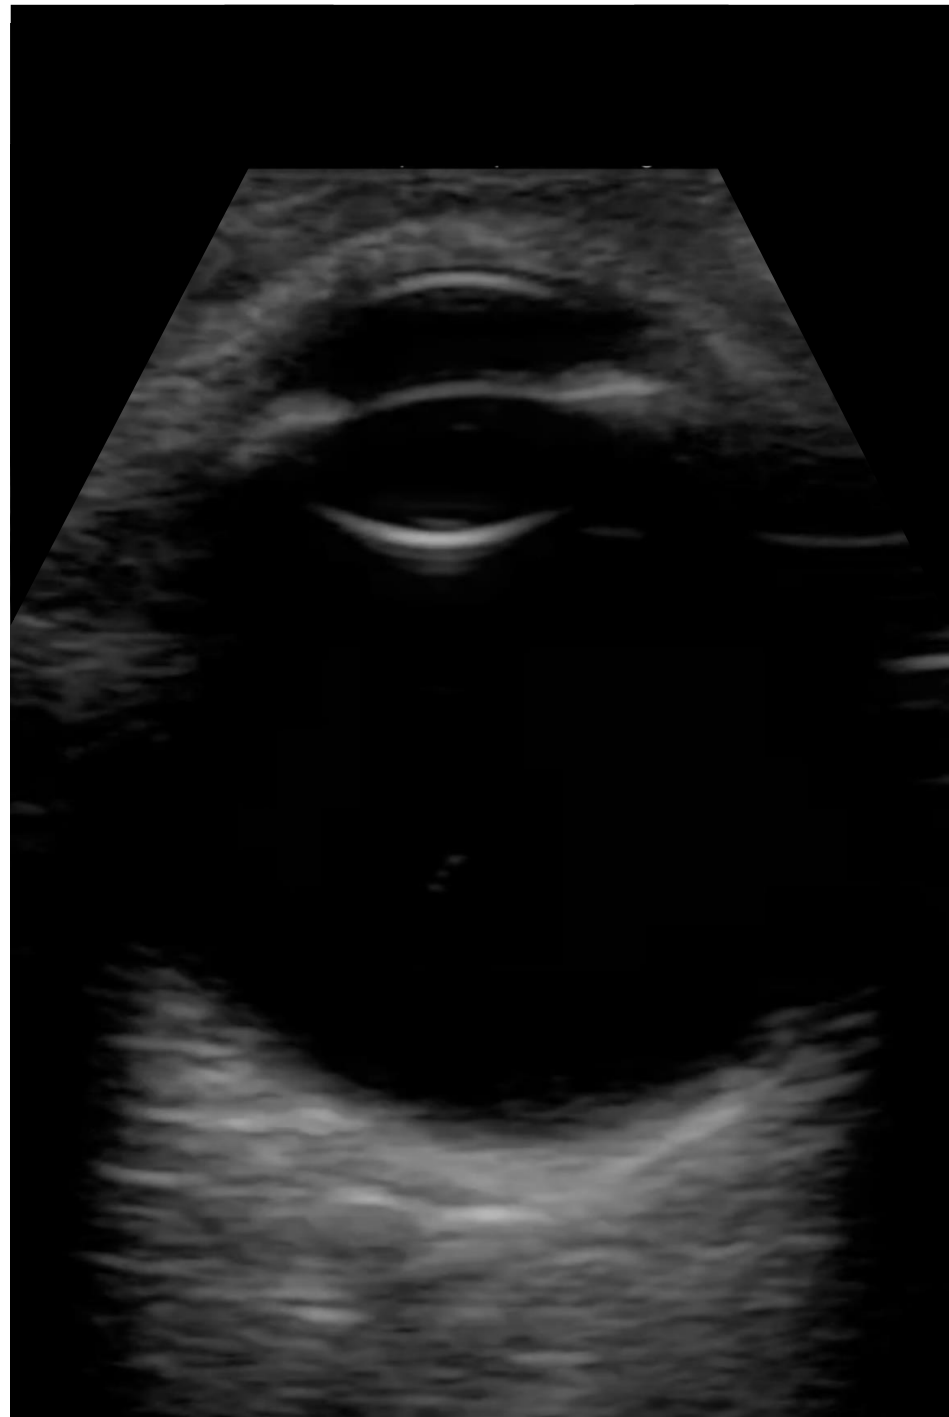

CC: CME F/u + Floaters  
71y/o M w/ cystoid  
macular degeneration  
OD, floater w/ PPV/AFX



# 5D

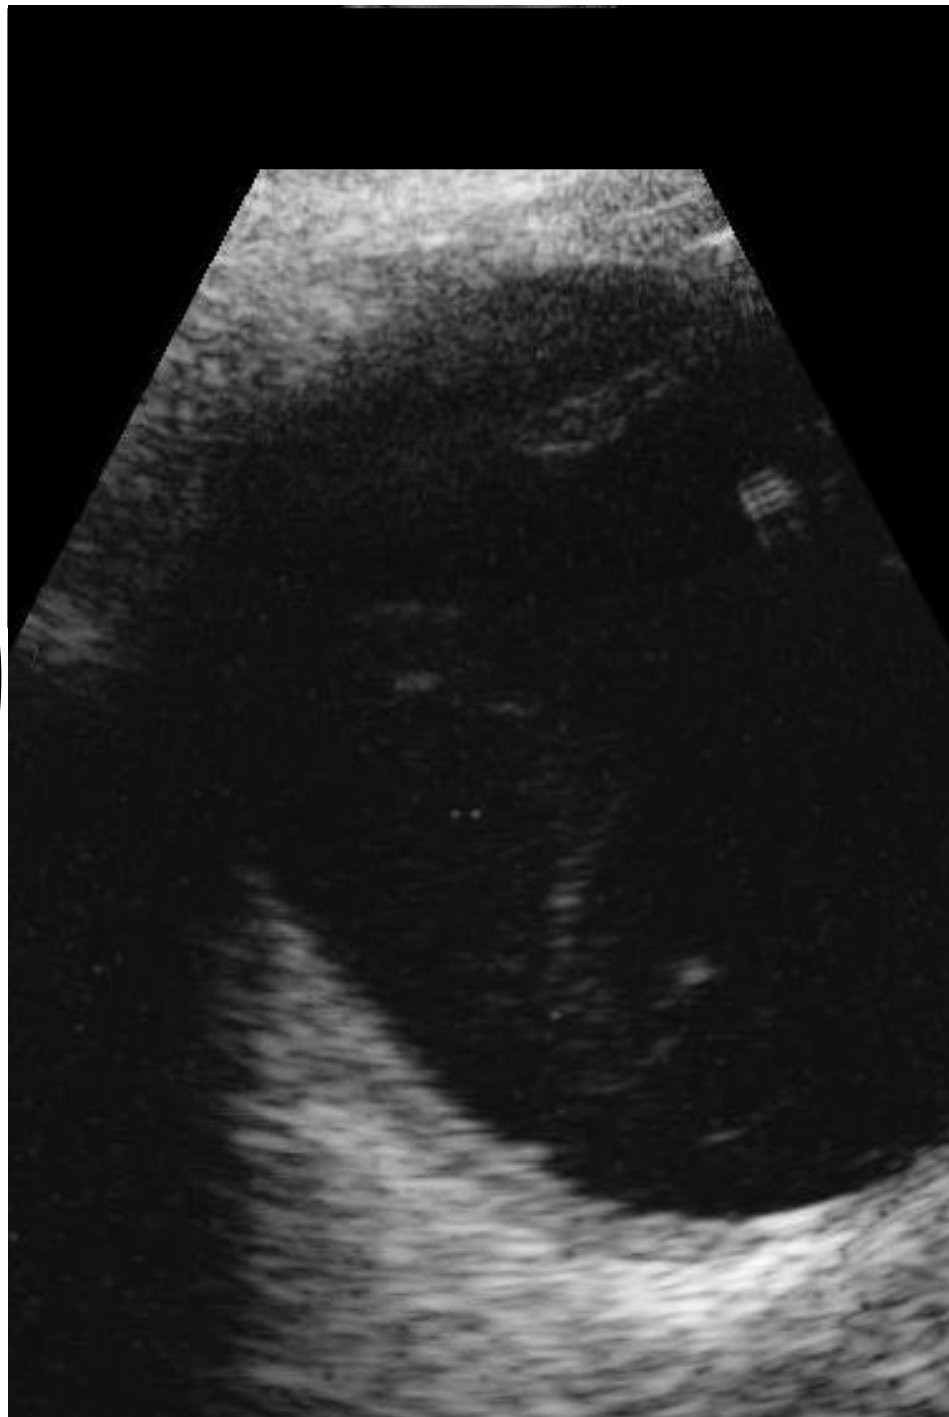

CC: CME F/u + Floaters  
71y/o M w/ cystoid  
macular degeneration  
OD, floater w/ PPV/AFX

# 5E

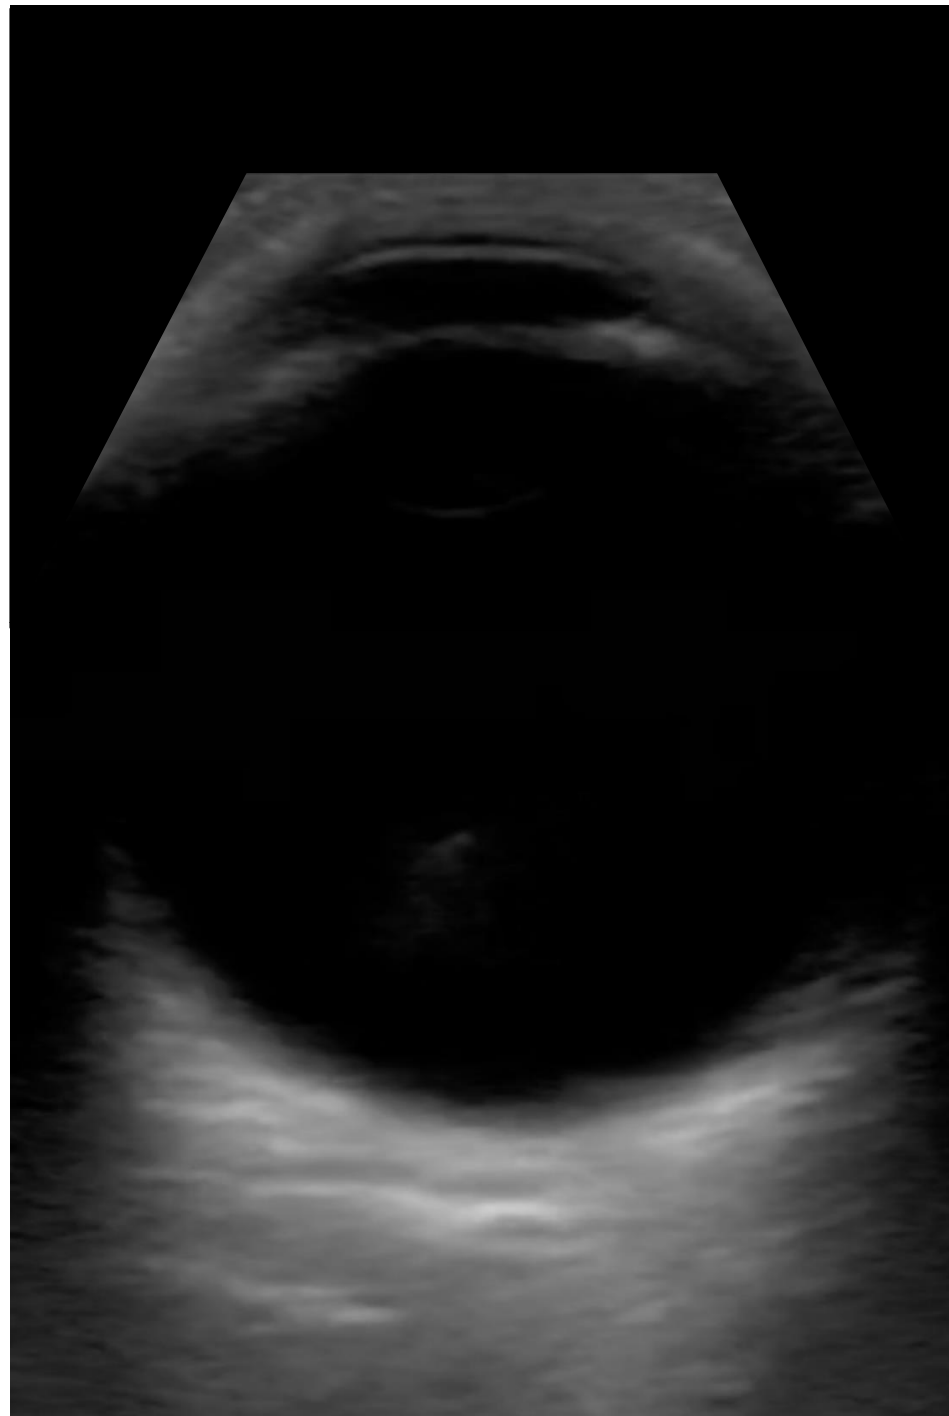

CC: CME F/u + Floaters  
71y/o M w/ cystoid  
macular degeneration  
OD, floater w/ PPV/AFX

6A

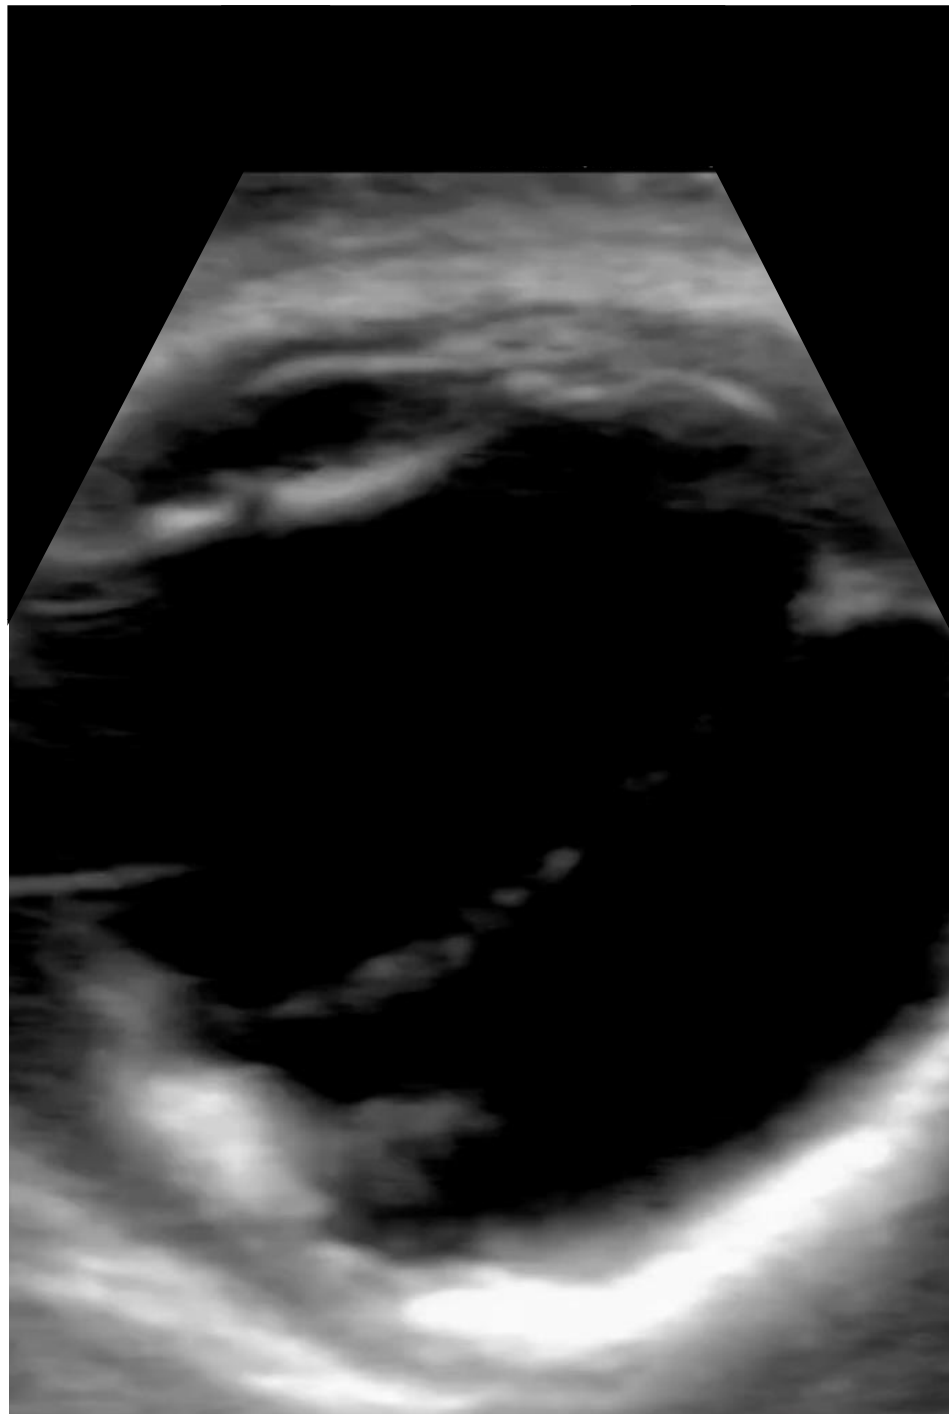

CC: OS Vit Heme F/u  
66 y/o M w/ h/o TRD OS,  
HIV, Aspergillus,  
tractional band, and  
diffuse retinal  
calcifications

6B

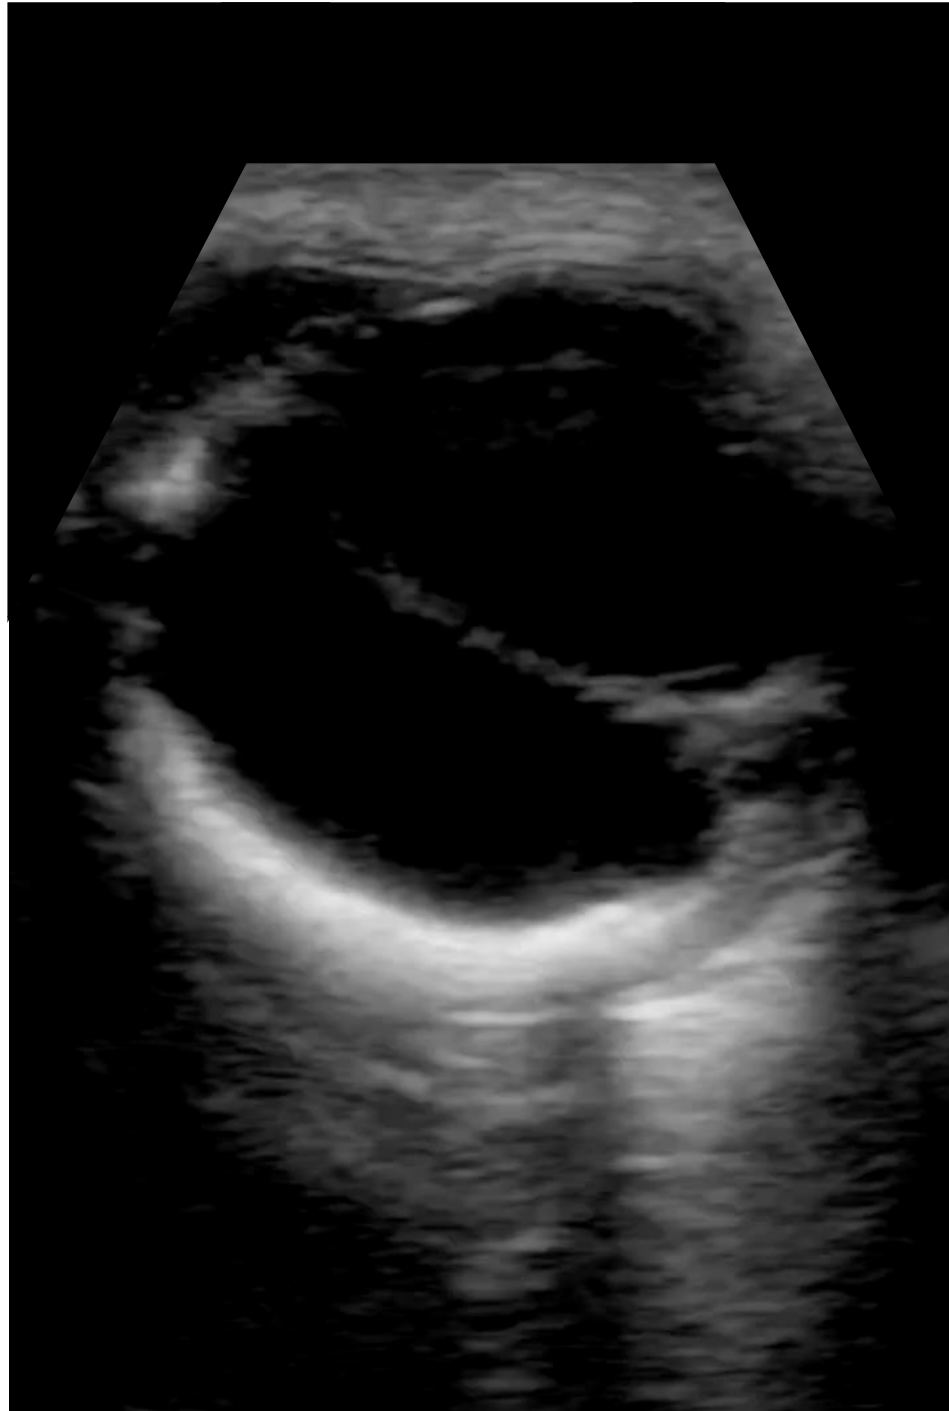

CC: OS Vit Heme F/u  
66 y/o M w/ h/o TRD OS,  
HIV, Aspergillus,  
tractional band, and  
diffuse retinal  
calcifications

6C

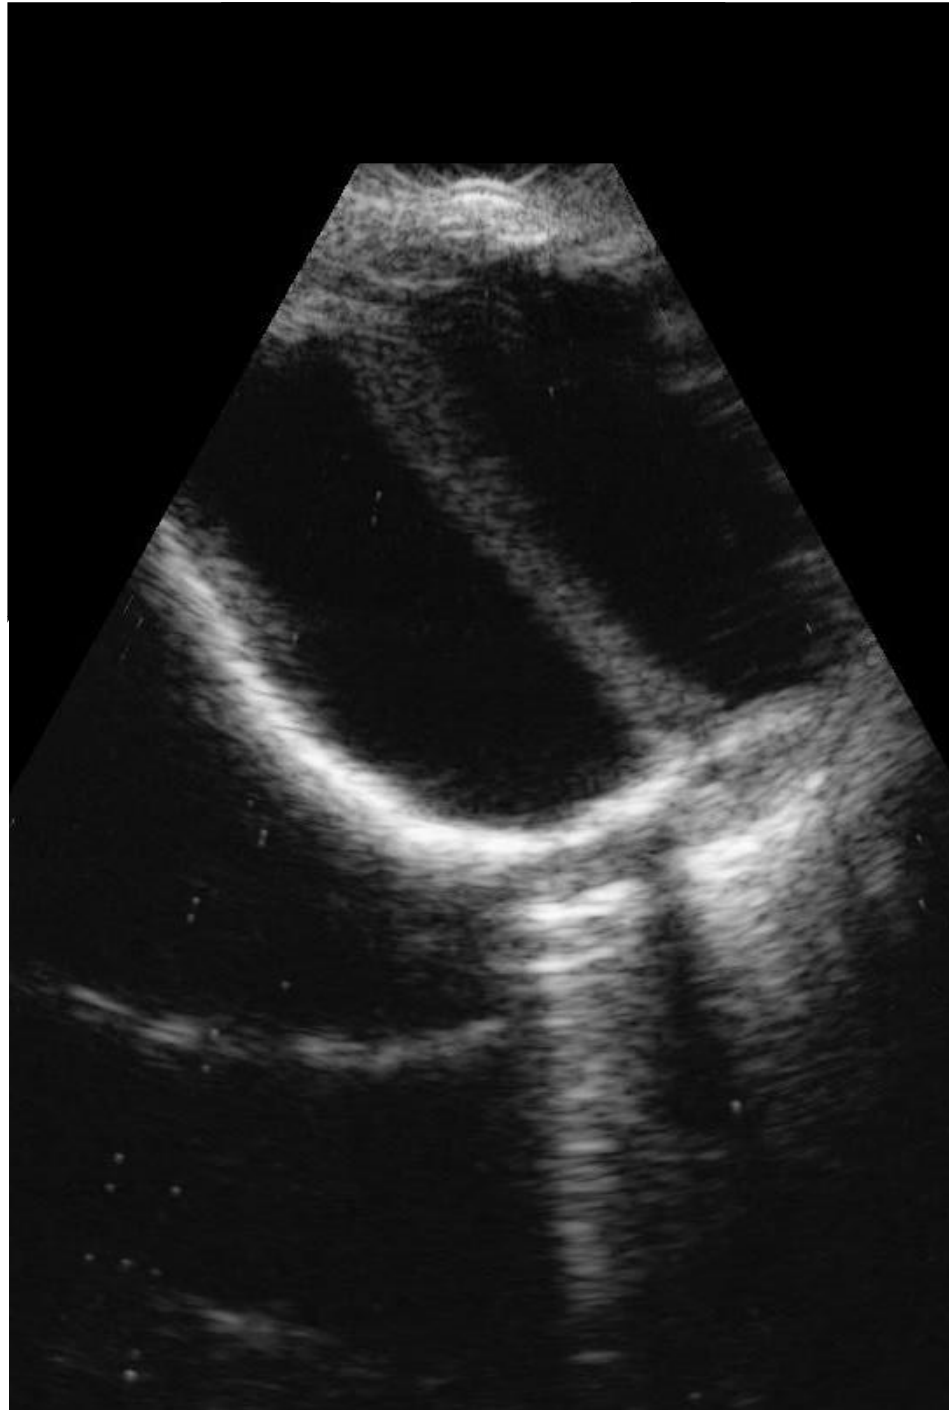

CC: OS Vit Heme F/u  
66 y/o M w/ h/o TRD OS,  
HIV, Aspergillus,  
tractional band, and  
diffuse retinal  
calcifications

6D

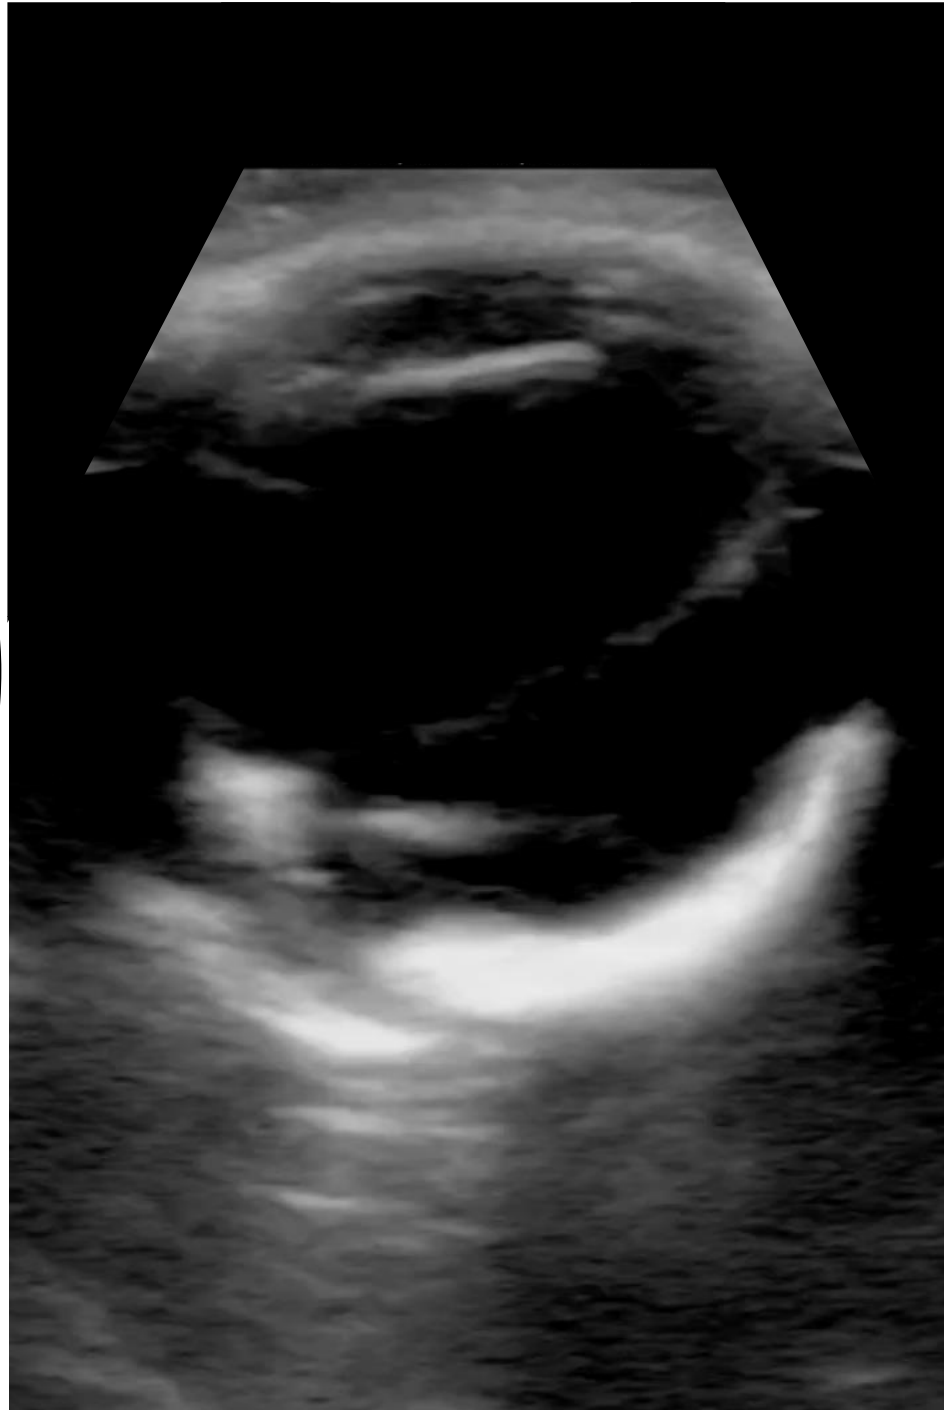

CC: OS Vit Heme F/u  
66 y/o M w/ h/o TRD OS,  
HIV, Aspergillus,  
tractional band, and  
diffuse retinal  
calcifications

6E

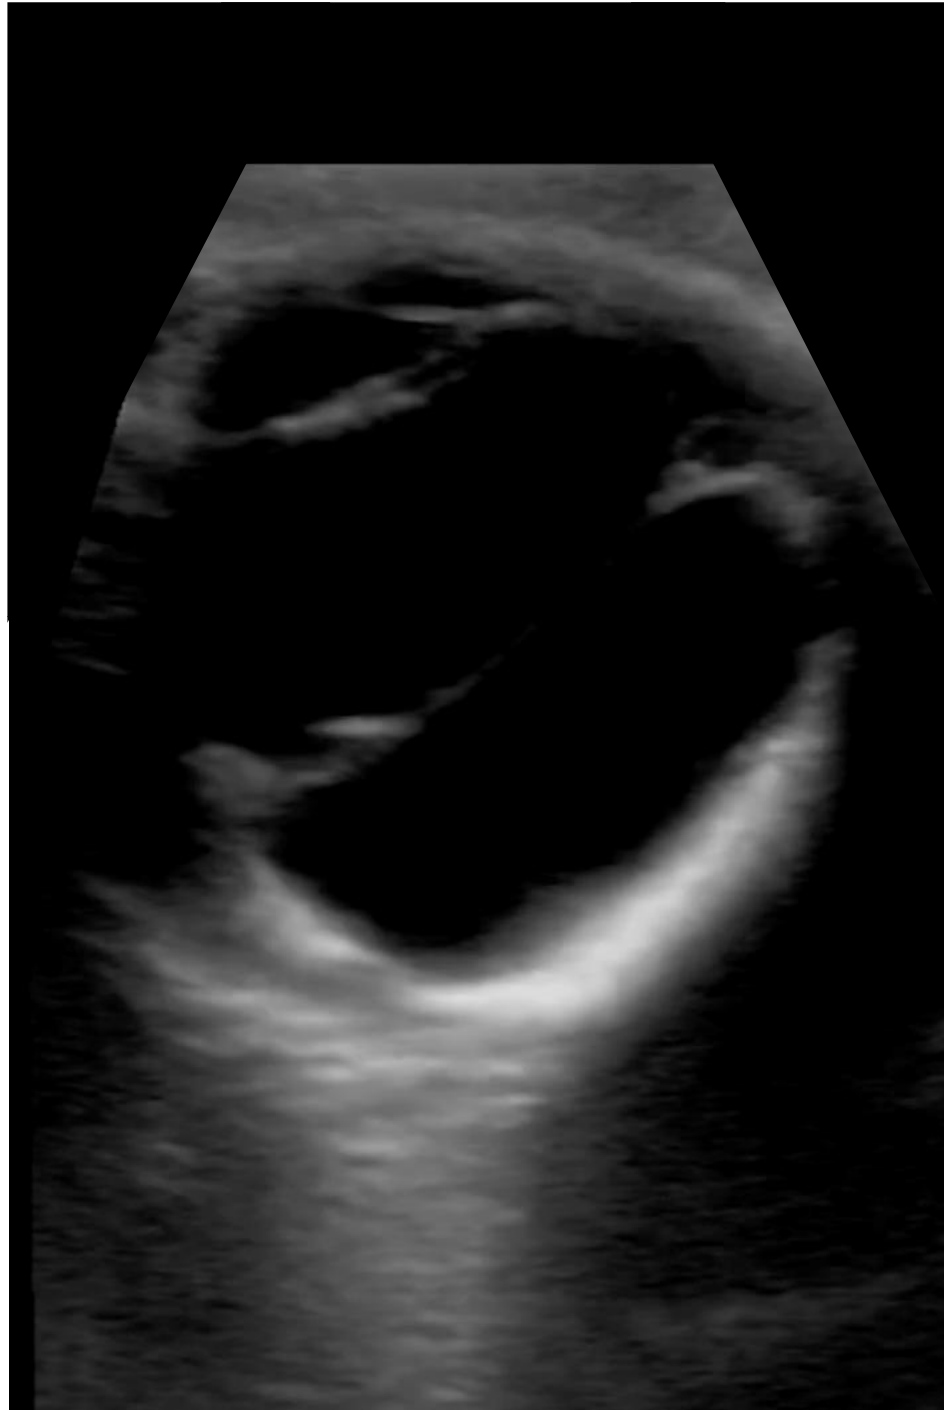

CC: OS Vit Heme F/u  
66 y/o M w/ h/o TRD OS,  
HIV, Aspergillus,  
tractional band, and  
diffuse retinal  
calcifications

7A

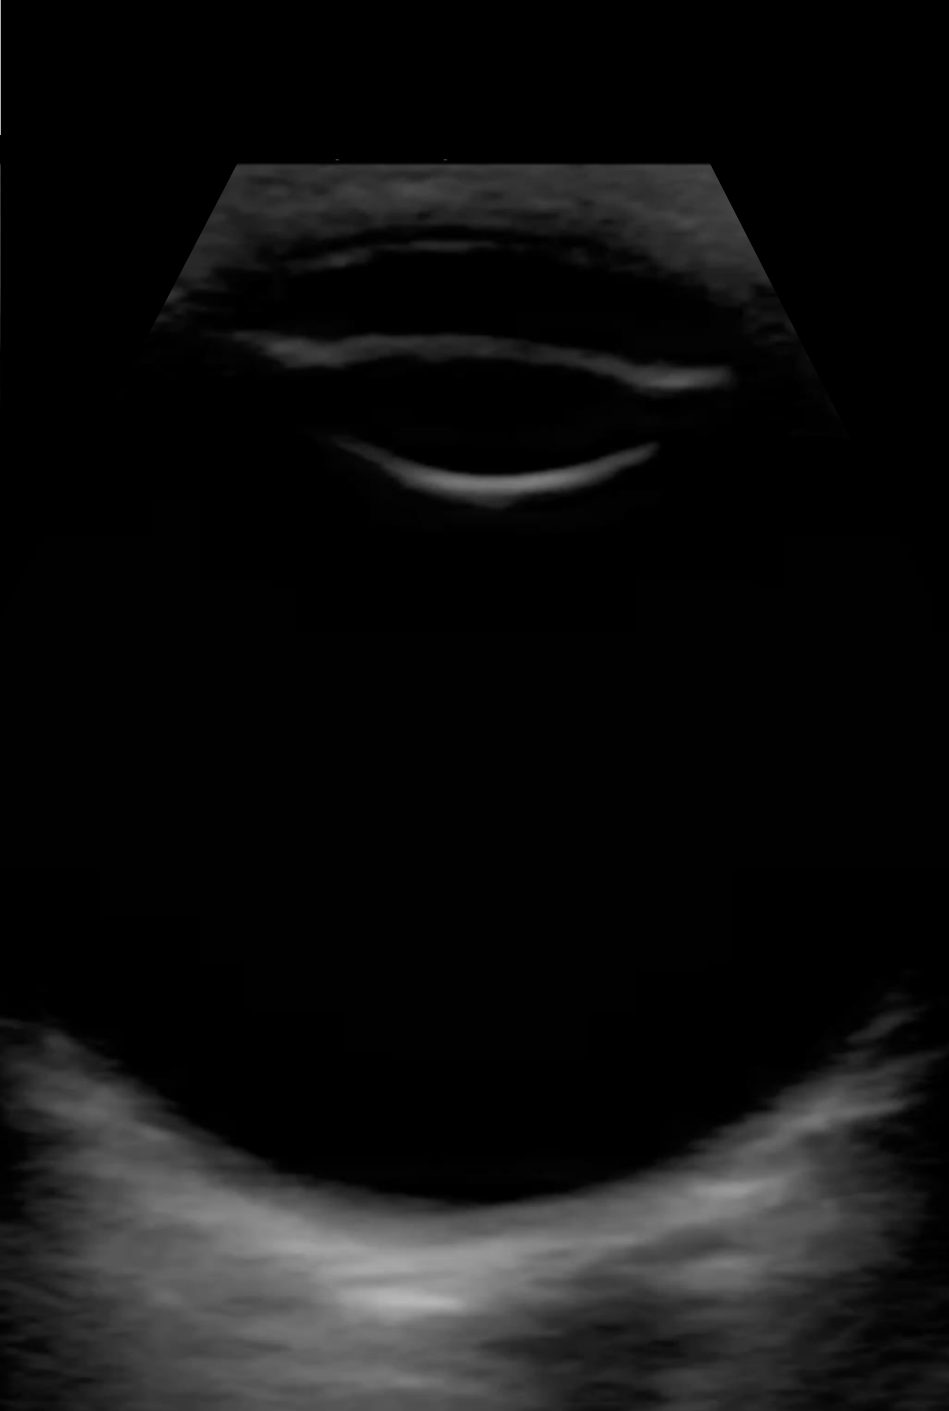

CC: Routine Visit  
Healthy Subject no POH



7B

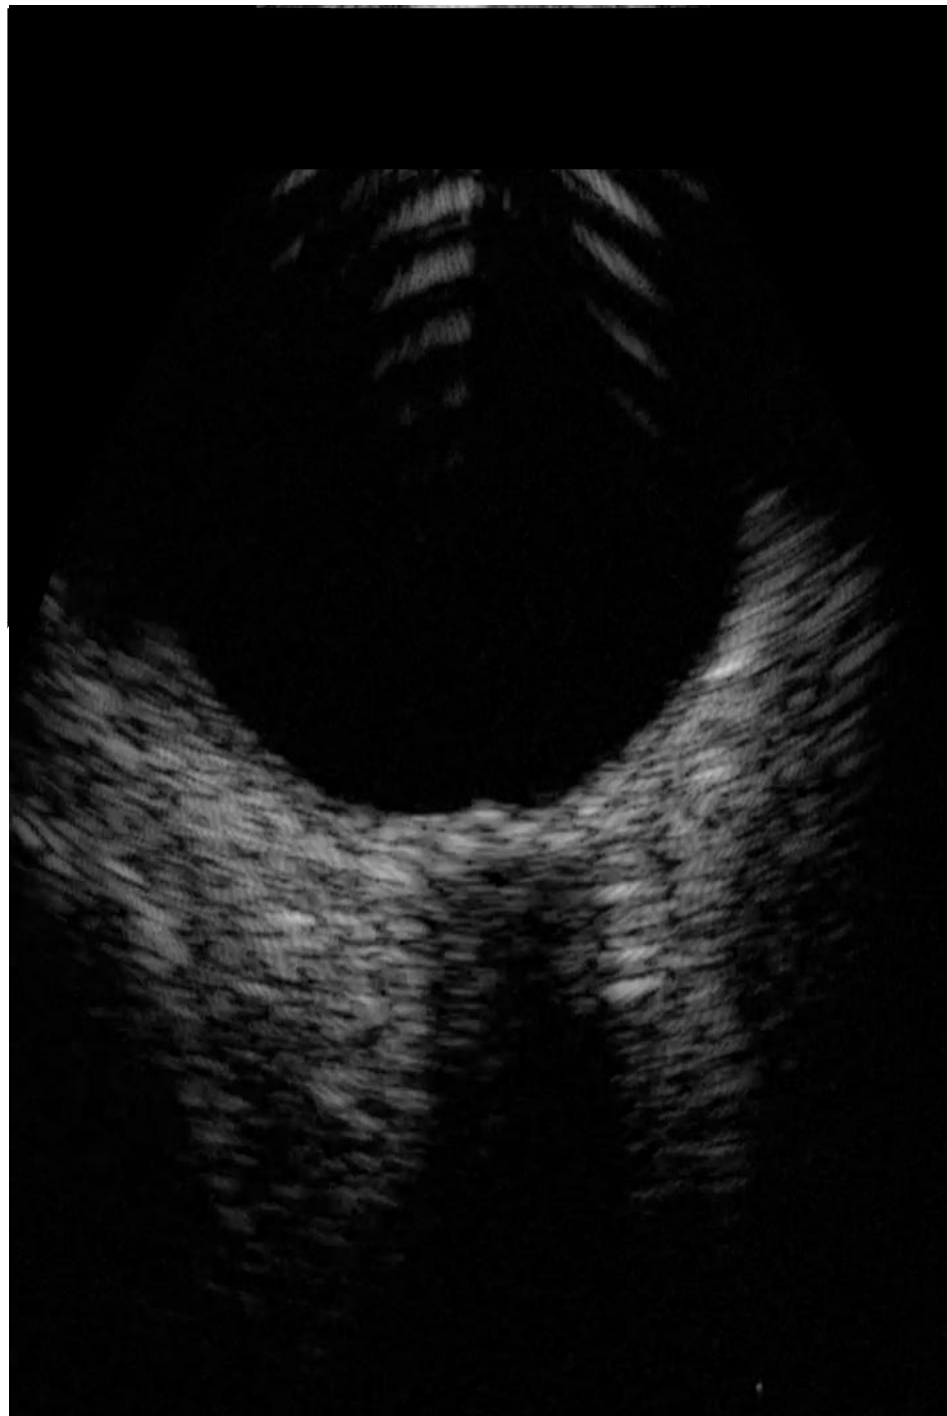

CC: Routine Visit  
Healthy Subject no POH

7C

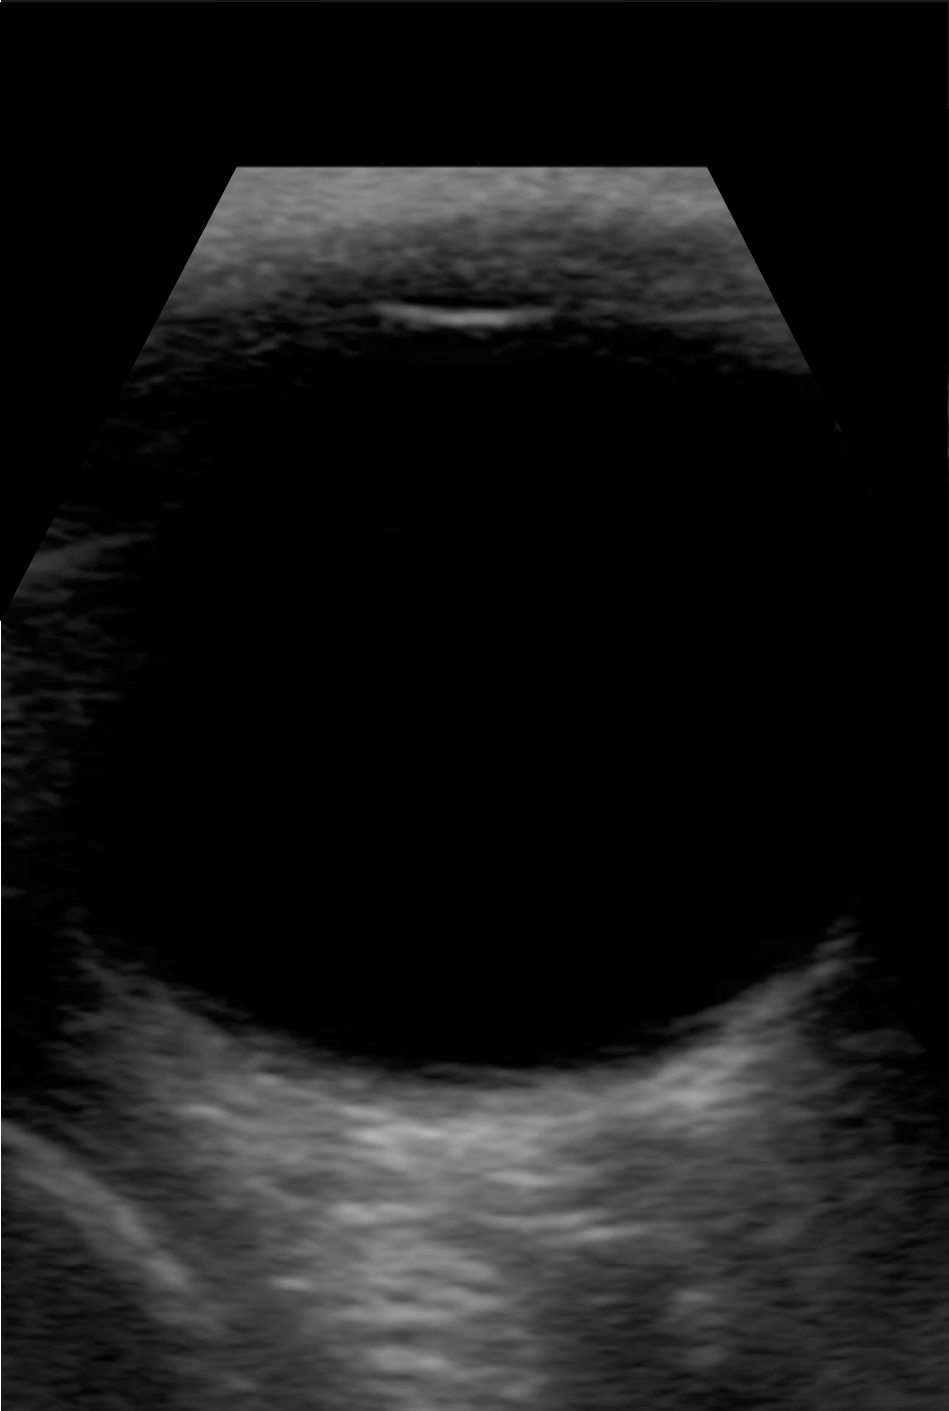

CC: Routine Visit  
Healthy Subject no POH

7D

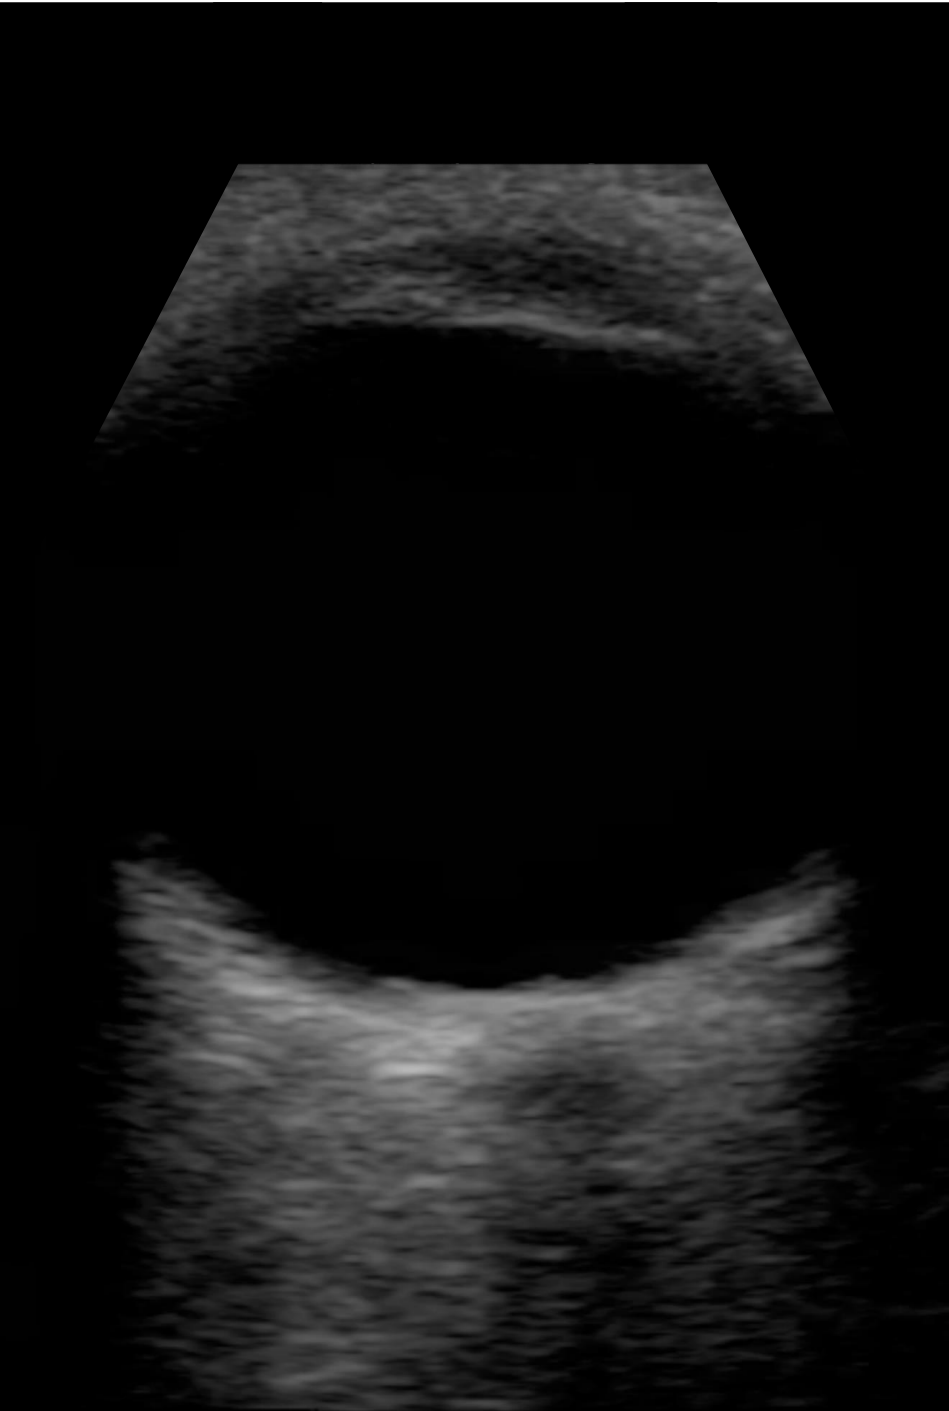

CC: Routine Visit  
Healthy Subject no POH

7E

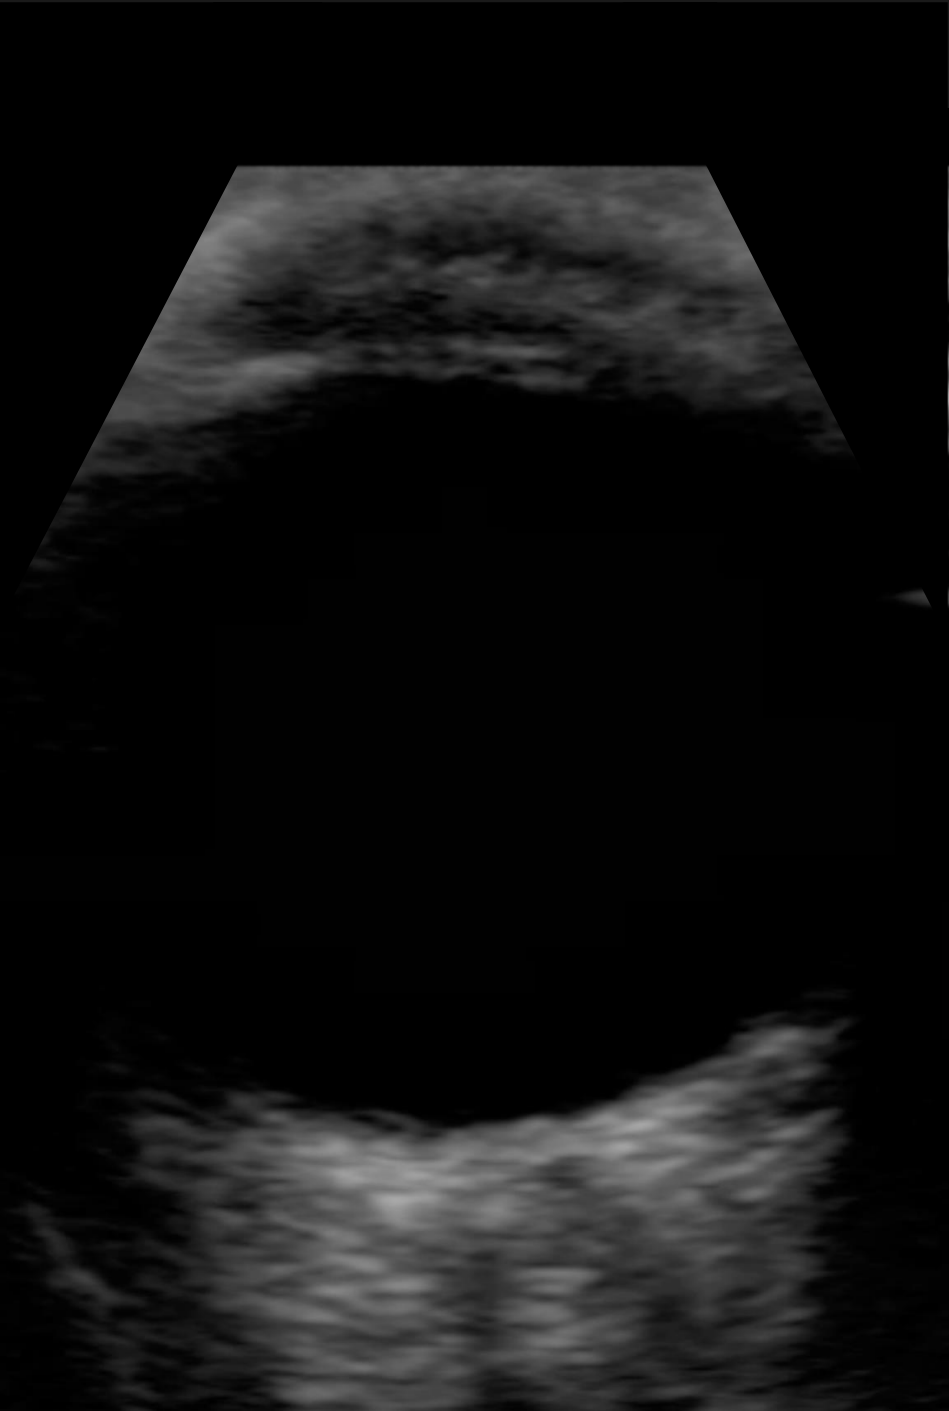

CC: Routine Visit  
Healthy Subject no POH
